# Supplementary material for: Copper on charcoal: Cu0 nanoparticle catalysed aerobic oxidation of α-diazo esters
Source: Royal Society of Chemistry journal article supplement (doi:10.1039/d1ob00811k), 2021-01-01
Supplement: d1ob00811k1.pdf [file d1ob00811k1.pdf]

## Supporting Information

### Copper on charcoal: Cu<sup>0</sup> nanoparticles catalysed aerobic oxidation of $\alpha$ -diazo esters

Rong Zhao<sup>a</sup>, Jiangge Teng<sup>a</sup>, Zhiwei Wang<sup>a</sup>, Wenwen Dong<sup>a</sup>, Jia Lin<sup>a</sup>, Changhu Chu<sup>a\*</sup>

<sup>a</sup> Engineering Research Centre of Pharmaceutical Process Chemistry, Ministry of Education, Shanghai Key Laboratory of New Drug Design, School of Pharmacy, East China University of Science and Technology, 130 Meilong Road, Shanghai, 200237, China

#### Table

|                                                                                               |     |
|-----------------------------------------------------------------------------------------------|-----|
| 1. General Information.....                                                                   | S1  |
| 2. Preparation of Cu/C Catalyst .....                                                         | S1  |
| 3. Characterization of Cu/C Catalyst .....                                                    | S2  |
| 3.1 High Resolution Transmission Electron Microscopy (HRTEM).....                             | S2  |
| 3.2 X-ray Photoelectron Spectroscopy (XPS) .....                                              | S2  |
| 3.3 X-ray Powder Diffraction (XRD) .....                                                      | S3  |
| 4. Experimental Section .....                                                                 | S3  |
| 4.1 Reaction of <b>1a</b> with H <sub>2</sub> O under nitrogen atmosphere (GC spectrum) ..... | S3  |
| 4.2 Reaction of <b>1a</b> with D <sub>2</sub> O (GC-MS spectrum) .....                        | S4  |
| 4.3 Reaction of <b>1a</b> with H <sub>2</sub> O <sup>18</sup> (GCMS spectrum).....            | S8  |
| 5. NMR spectrums .....                                                                        | S11 |

## 1. General Information

**Materials.** Commercial reagents were acquired from Macklin, Adamas-beta, Aladdin, Bidepharm or, and used as received. All solvents were distilled from CaH<sub>2</sub> unless otherwise stated. Flash column chromatography was performed over silica gel 300-400 mesh.

**Instruments.** <sup>1</sup>H NMR and <sup>13</sup>C NMR were recorded on a Bruker AV400 spectrometer at room temperature. Proton chemical shifts are reported in ppm downfield from tetramethylsilane or from the residual solvent as internal standard in CDCl<sub>3</sub> (δ 7.26 ppm). Carbon chemical shifts were internally referenced to the deuterated solvent signals in CDCl<sub>3</sub> (δ 77.16 ppm). High Resolution Mass Spectrometer (HRMS) was obtained by a GCT Premier instrument. High Resolution Transmission Electron Microscopy (HRTEM) investigations were carried out on a JEM-2100 instrument. Inductively Coupled Plasma (ICP) was obtained on an Agilent 725 instrument. X-ray photoelectron spectroscopy (XPS) was carried out on a ESCALAB 250Xi instrument. X-ray Powder Diffractometer (XRD) was obtained by D/max2550VB/PC instrument. Gas chromatography - mass spectrometry (GC-MS) was carried out on an Agilent 7890A-5975C instrument. Gas chromatography (GC) was obtained on a Shimadzu GC-2010 Plus instrument.

**General GC conditions.** FID detector; carrier gas: nitrogen.

Compounds were detected under a condition as: column temperature: 50 °C for 5 minutes, raising to 250 °C in a rate of 20 °C/min, holding at 250 °C for 5 min.

## 2. Preparation of Cu/C Catalyst

To a solution of CuCl<sub>2</sub>·2H<sub>2</sub>O (1 g) in ethanol (80 mL), naphthalene (2 g) and activated carbon (4 g) were added subsequently. This suspension was heated to reflux with stirring. At this point, hydrazine hydrate (80%, 20 mL) was added drop wisely in half an hour. After addition, the resulting mixture was refluxed for 8h. Finally, reaction mixture was cooled to room temperature, and the solid was collected by filtration through a Buchner funnel, and washed twice with anhydrous ethanol (2×10 mL). Thus obtained solid was dried and then heated at 300 °C under nitrogen atmosphere for an hour, which was stored in a bottle and used as catalyst.

### 3. Characterization of Cu/C Catalyst

#### 3.1 High Resolution Transmission Electron Microscopy (HRTEM)

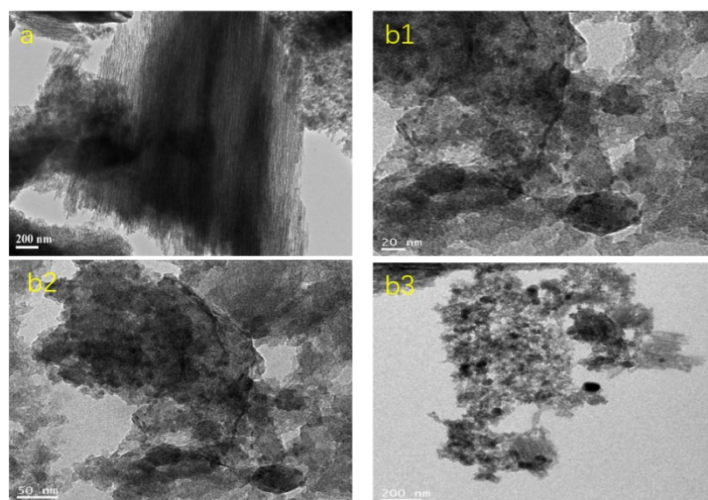

**Fig. 1** a, HRTEM of Charcoal; b, Cu/C catalyst

#### 3.2 X-ray Photoelectron Spectroscopy (XPS)

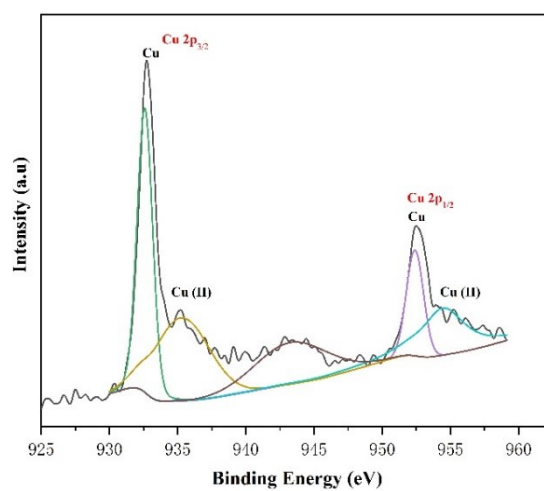

**Fig. 2** XPS of Cu/C catalyst

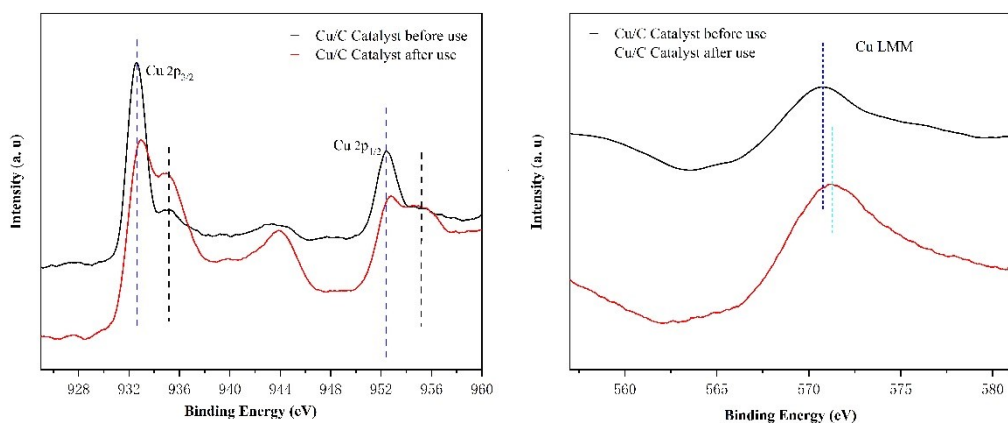

**Fig. 3** XPS of the Cu/C catalyst before and after the reaction

### 3.3 X-ray Powder Diffraction (XRD)

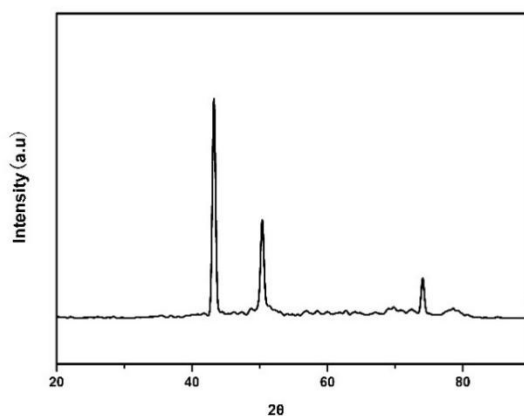

**Fig. 4** XRD of Cu/C catalyst

## 4. Experimental Section

### 4.1 Reaction of **1a** with H<sub>2</sub>O under nitrogen atmosphere (GC spectrum)

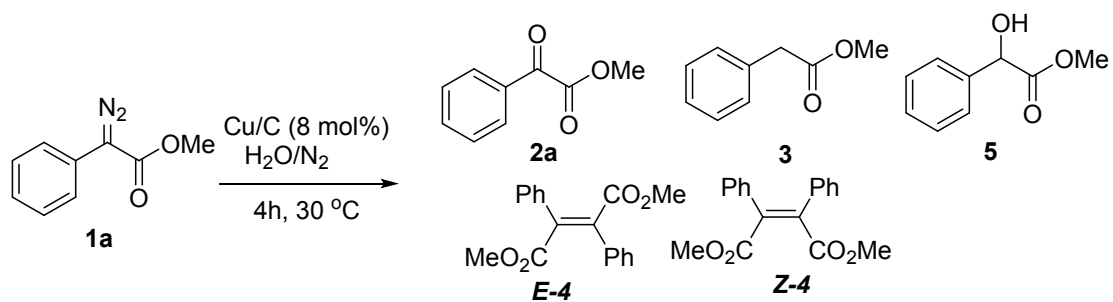

<色谱图>

mV

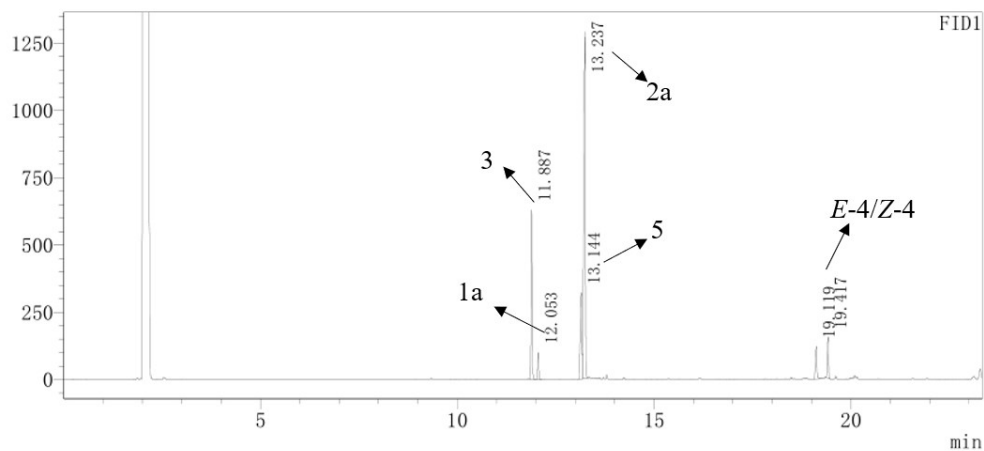

Peak Table

| Peak  | Ret. Time(min) | Area    | Height  | Conc. | Units | Mark | Area%  |
|-------|----------------|---------|---------|-------|-------|------|--------|
| 1     | 11.887         | 1142924 | 617141  | 0.000 |       |      | 18.292 |
| 2     | 12.053         | 173733  | 99016   | 0.000 |       |      | 2.780  |
| 3     | 13.144         | 877450  | 319016  | 0.000 |       |      | 14.043 |
| 4     | 13.237         | 3458365 | 1280705 | 0.000 |       | V    | 55.347 |
| 5     | 19.119         | 296223  | 119625  | 0.000 |       |      | 4.741  |
| 6     | 19.417         | 299763  | 150838  | 0.000 |       |      | 4.797  |
| Total |                | 6248359 | 2586341 |       |       |      | 100    |

**Figure 5** GC diagram Cu/C (8 mol%) catalyzed reaction of **1a** with H<sub>2</sub>O under nitrogen atmosphere for 4 h, all of peaks were confirmed by authority sample.

#### 4.2 Reaction of **1a** with D<sub>2</sub>O (GC-MS spectrum)

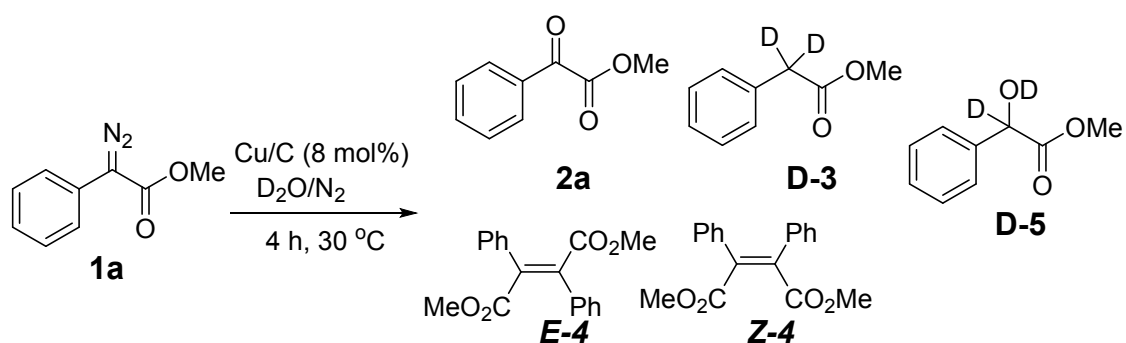

### Chromatogram Plot Report

Agilent

|                |        |              |                    |         |                   |                                    |
|----------------|--------|--------------|--------------------|---------|-------------------|------------------------------------|
| Name           | ZR-Q   | Rack Pos.    | Instrument         | HS-GCMS | Operator          | DESKTOP-DJUCGF/Hisoar-GC-002       |
| Inj. Vol. (ul) | 1      | Plate Pos.   | RM Status          |         | Acq. Time (Local) | 10/21/2020 12:02:48 PM (UTC+08:00) |
| Data File      | ZR-Q.D | Method (Acq) | Front-RD2008-8-9.M | Comment |                   |                                    |

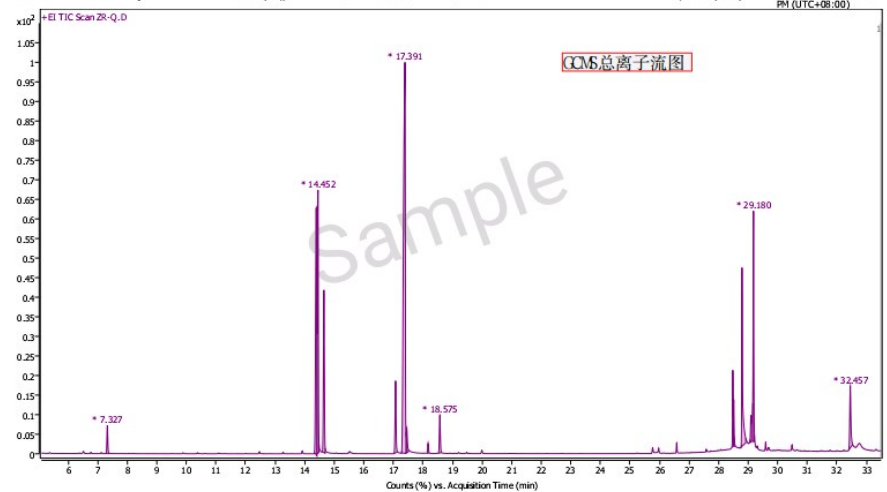

Page 1 of 2

Generated at 10:32 AM on 10/23/2020

### Spectrum Plot Report

Agilent

|                |        |              |                    |         |                   |                                    |
|----------------|--------|--------------|--------------------|---------|-------------------|------------------------------------|
| Name           | ZR-Q   | Rack Pos.    | Instrument         | HS-GCMS | Operator          | DESKTOP-DJUCGF/Hisoar-GC-002       |
| Inj. Vol. (ul) | 1      | Plate Pos.   | RM Status          |         | Acq. Time (Local) | 10/21/2020 12:02:48 PM (UTC+08:00) |
| Data File      | ZR-Q.D | Method (Acq) | Front-RD2008-8-9.M | Comment |                   |                                    |

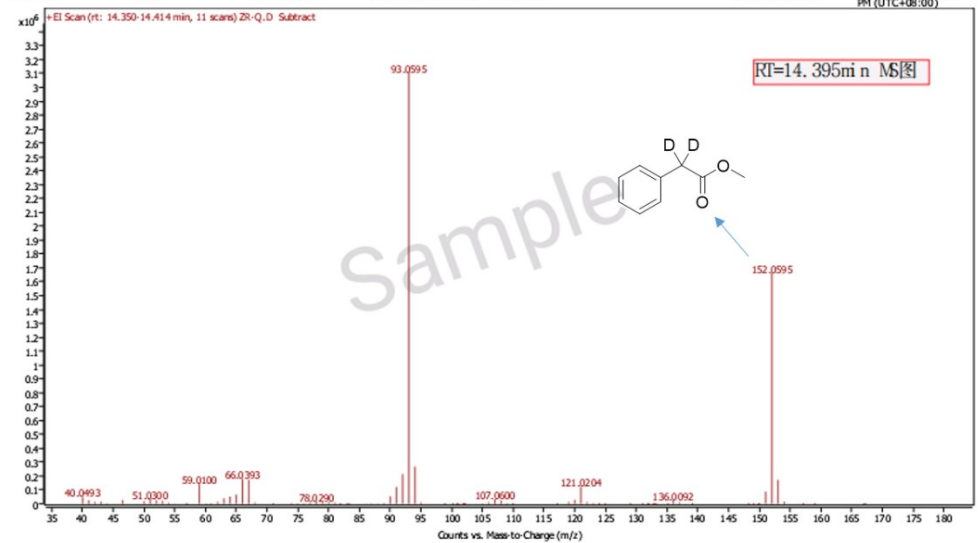

Page 1 of 2

Generated at 10:39 AM on 10/23/2020

# Spectrum Plot Report

Agilent Noted Assays

|                |        |              |                    |            |         |                   |                                    |
|----------------|--------|--------------|--------------------|------------|---------|-------------------|------------------------------------|
| Name           | ZR-Q   | Rack Pos.    |                    | Instrument | HS-GCMS | Operator          | DESKTOP-DJCCGPHisoar-GC-002        |
| Inj. Vol. (ul) | 1      | Plate Pos.   |                    | IRM Status |         | Acq. Time (Local) | 10/21/2020 12:02:48 PM (UTC+08:00) |
| Data File      | ZR-Q.D | Method (Acq) | Front-RD2008-8-9.M | Comment    |         |                   |                                    |

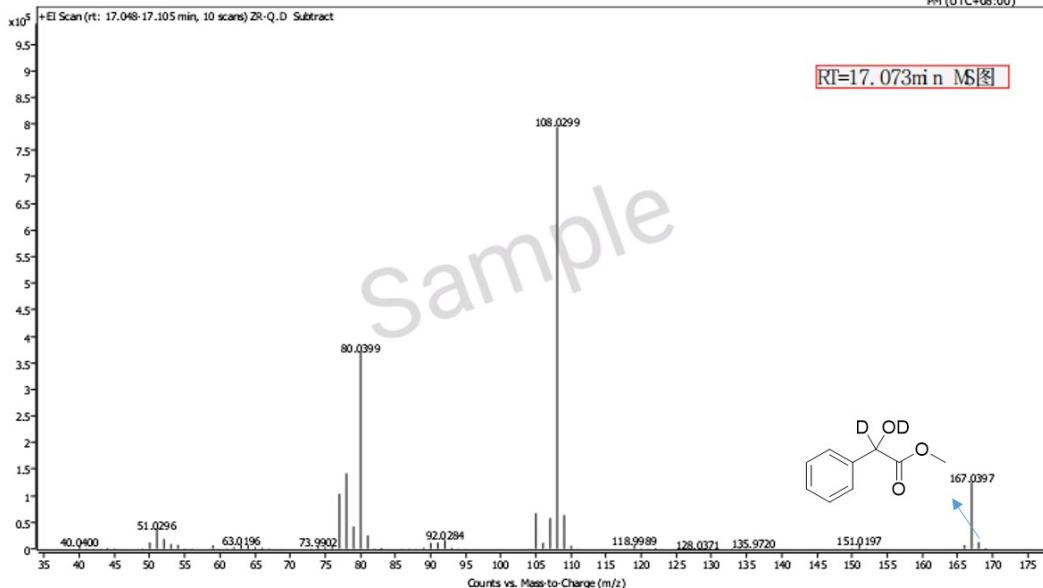

# Spectrum Plot Report

Agilent Noted Assays

|                |        |              |                    |            |         |                   |                                    |
|----------------|--------|--------------|--------------------|------------|---------|-------------------|------------------------------------|
| Name           | ZR-Q   | Rack Pos.    |                    | Instrument | HS-GCMS | Operator          | DESKTOP-DJCCGPHisoar-GC-002        |
| Inj. Vol. (ul) | 1      | Plate Pos.   |                    | IRM Status |         | Acq. Time (Local) | 10/21/2020 12:02:48 PM (UTC+08:00) |
| Data File      | ZR-Q.D | Method (Acq) | Front-RD2008-8-9.M | Comment    |         |                   |                                    |

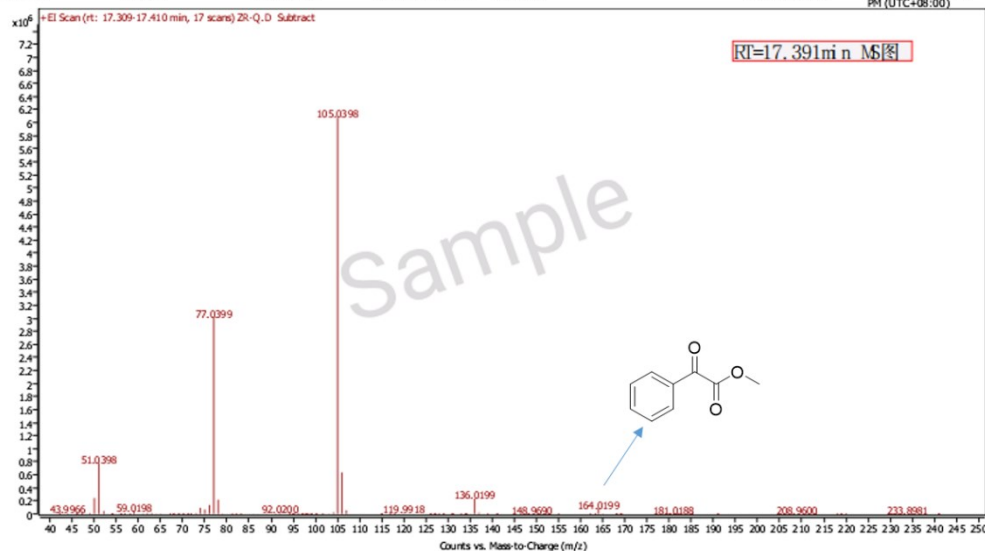

### Spectrum Plot Report

Agilent | United States

|                |        |              |                    |         |                   |                                    |
|----------------|--------|--------------|--------------------|---------|-------------------|------------------------------------|
| Name           | ZR-Q   | Rack Pos.    | Instrument         | HS-GCMS | Operator          | DESKTOP-DJUCGPHisoar-GC-002        |
| Inj. Vol. (ul) | 1      | Plate Pos.   | IRM Status         |         | Acq. Time (Local) | 10/21/2020 12:02:48 PM (UTC+08:00) |
| Data File      | ZR-Q.D | Method (Acq) | Front-RD2008-8-9.M | Comment |                   |                                    |

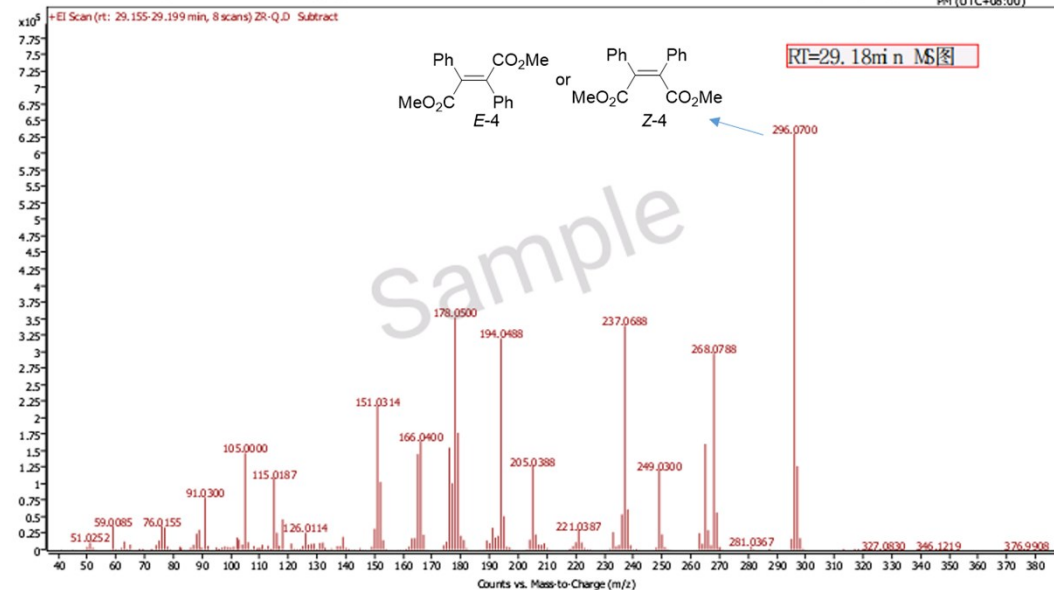

Page 1 of 2

Generated at 10:46 AM on 10/23/2020

### Spectrum Plot Report

Agilent | United States

|                |        |              |                    |         |                   |                                    |
|----------------|--------|--------------|--------------------|---------|-------------------|------------------------------------|
| Name           | ZR-Q   | Rack Pos.    | Instrument         | HS-GCMS | Operator          | DESKTOP-DJUCGPHisoar-GC-002        |
| Inj. Vol. (ul) | 1      | Plate Pos.   | IRM Status         |         | Acq. Time (Local) | 10/21/2020 12:02:48 PM (UTC+08:00) |
| Data File      | ZR-Q.D | Method (Acq) | Front-RD2008-8-9.M | Comment |                   |                                    |

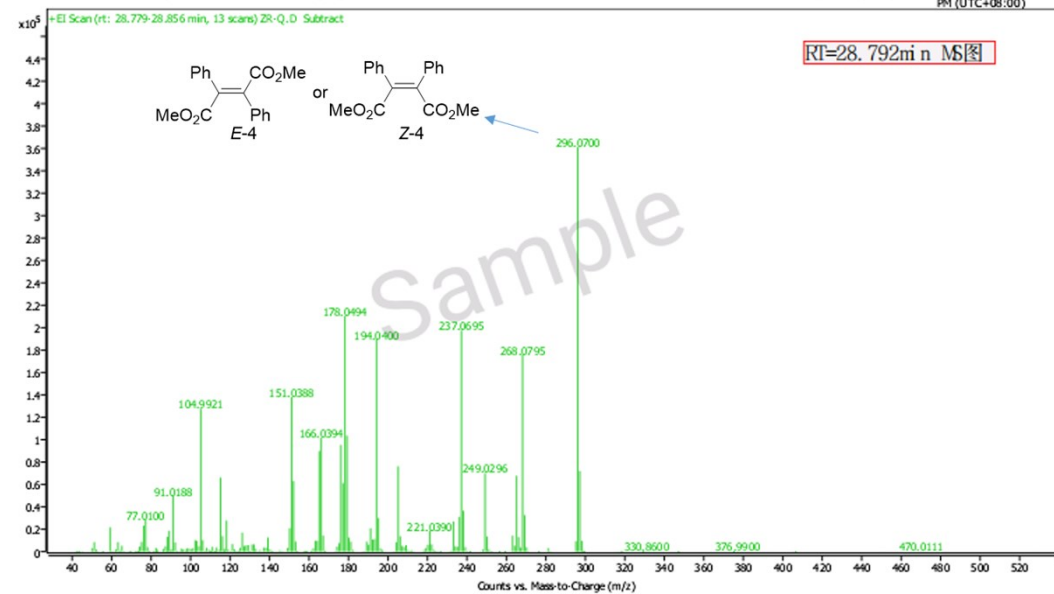

Page 1 of 2

Generated at 10:45 AM on 10/23/2020

Figure 6 GC-MS diagram of 1a reacts with D<sub>2</sub>O



### 4.3 Reaction of **1a** with H<sub>2</sub>O<sup>18</sup> (GC-MS spectrum)

Abundance

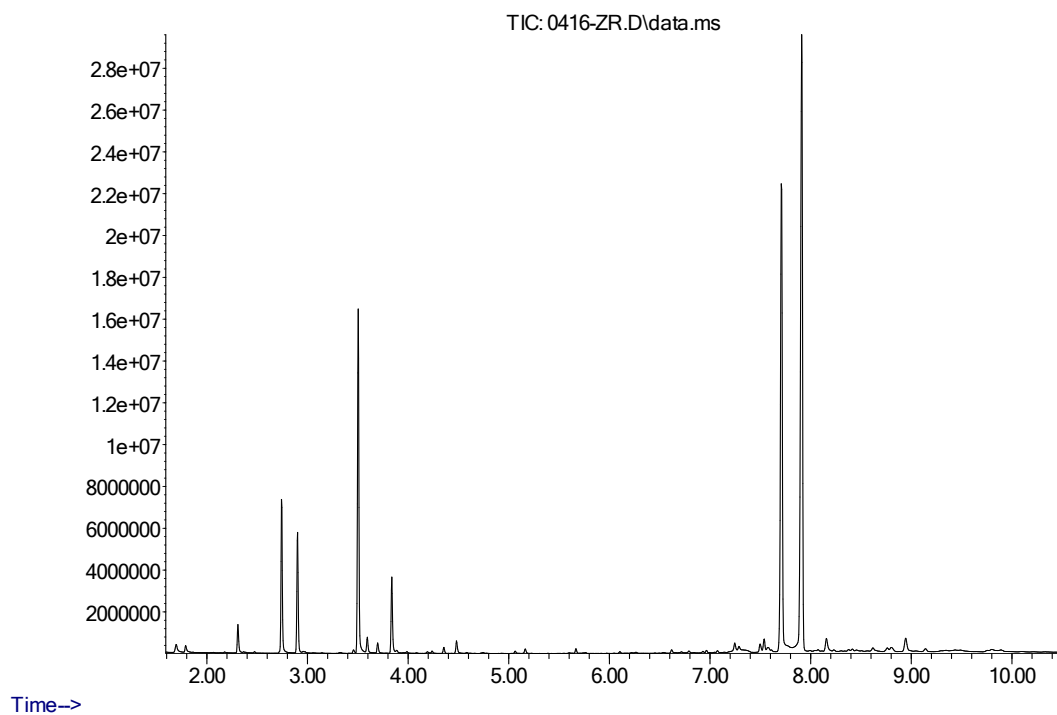

Abundance

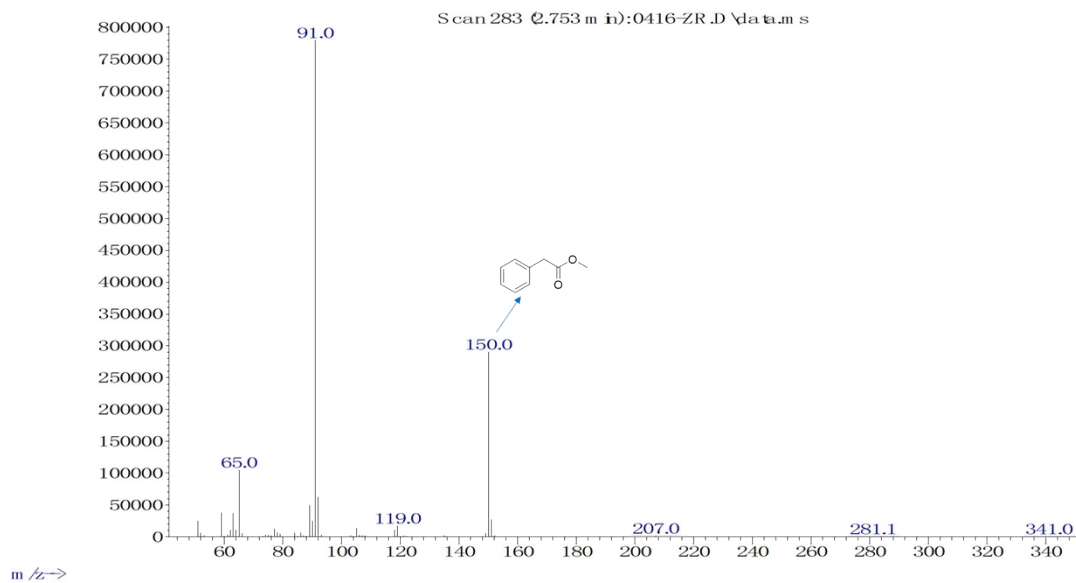

Abundance

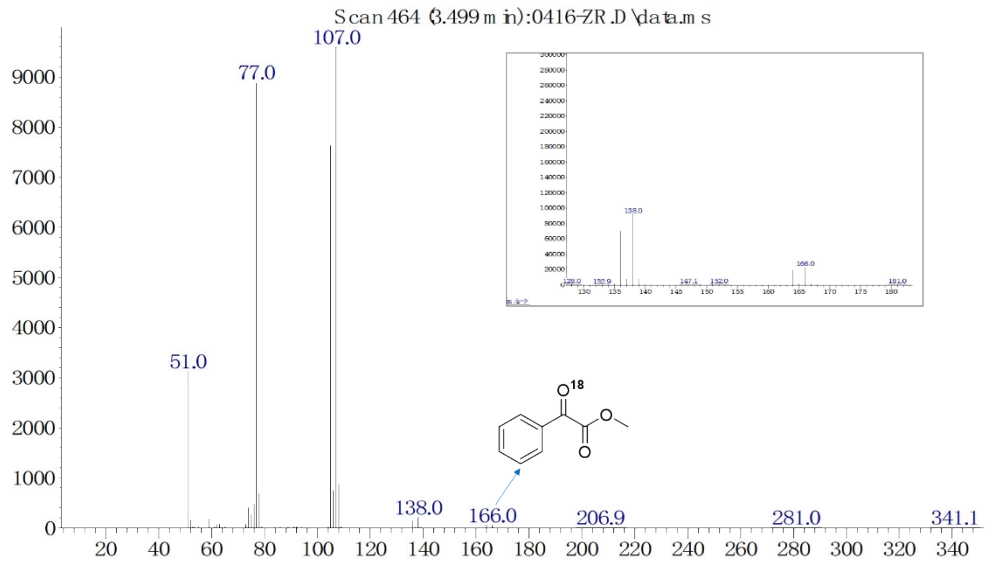

Abundance

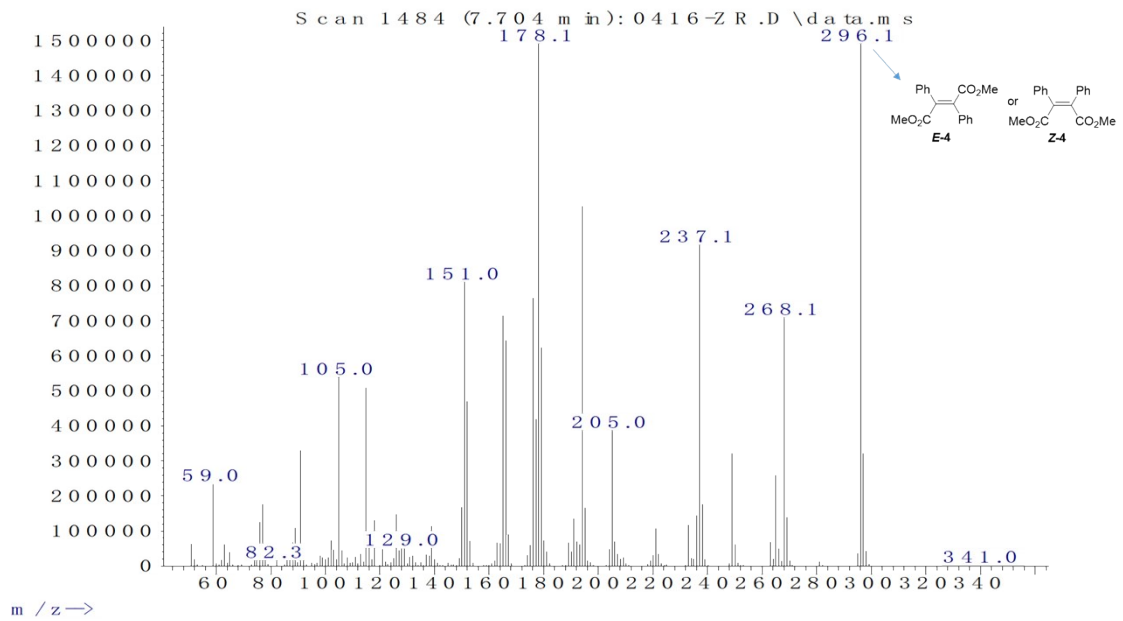

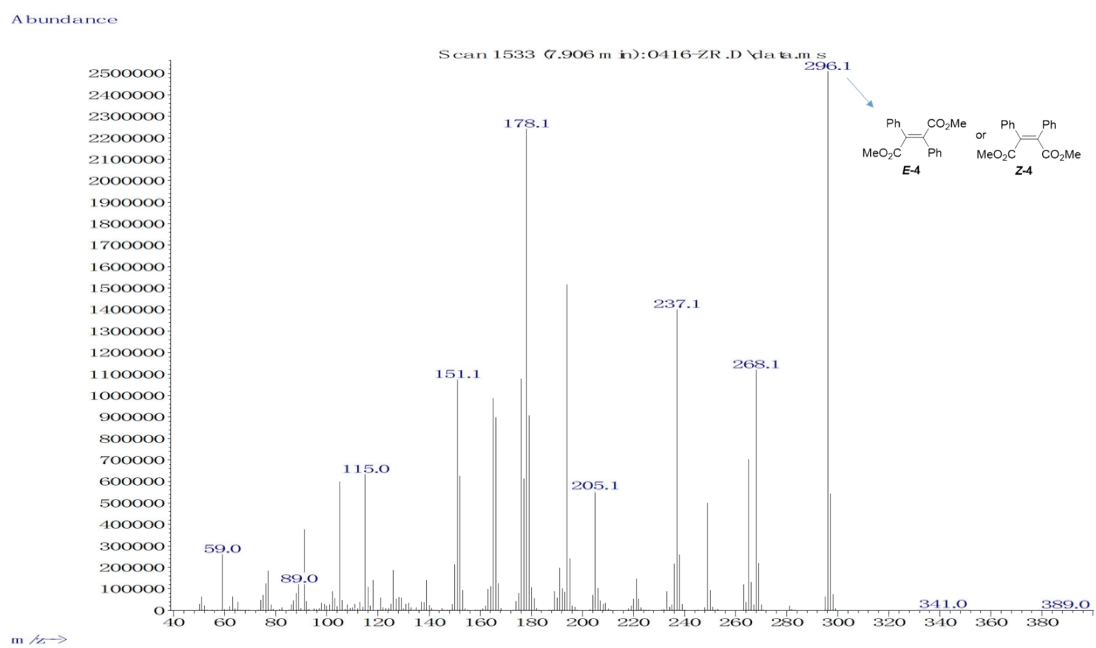

**Figure 7** GC-MS diagram of 1a reacts with H<sub>2</sub>O<sup>18</sup>

## 5. NMR spectrums

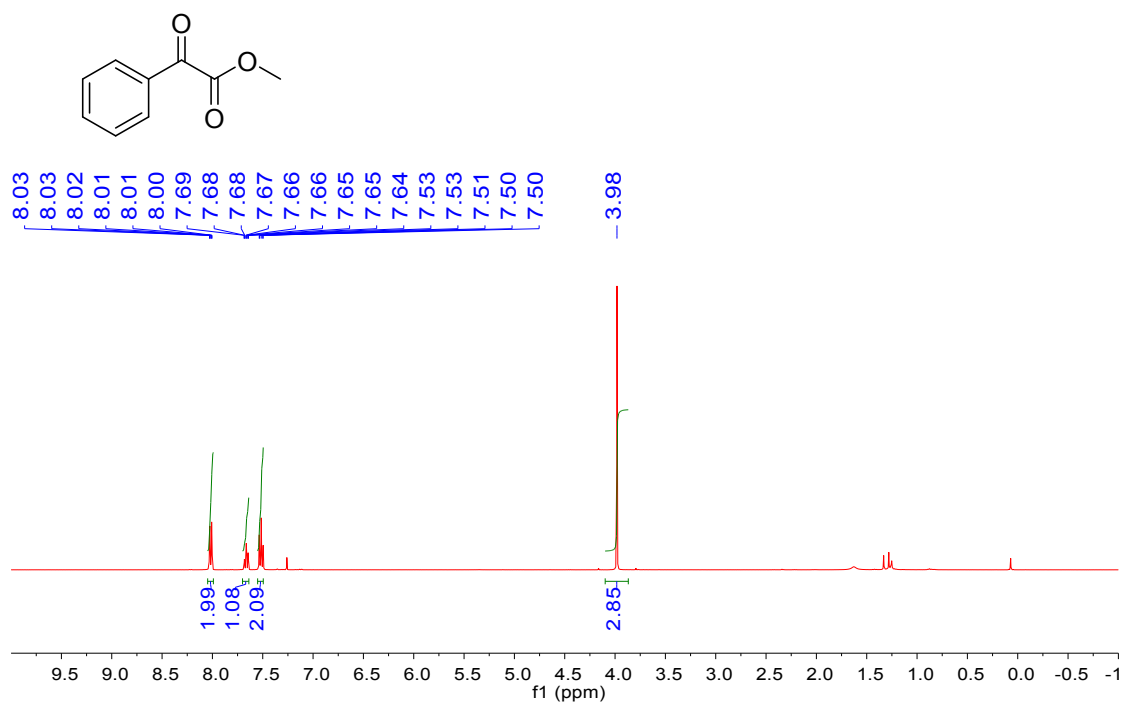

<sup>1</sup>H NMR spectrum of compound 2a

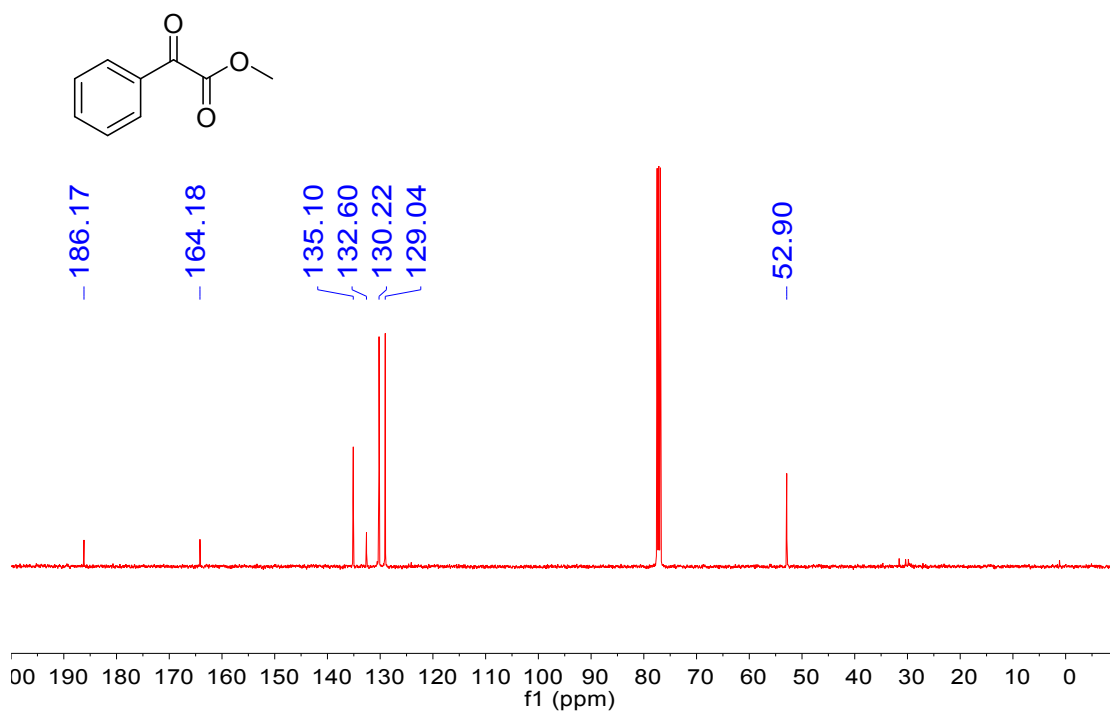

<sup>13</sup>C NMR spectrum of compound 2a

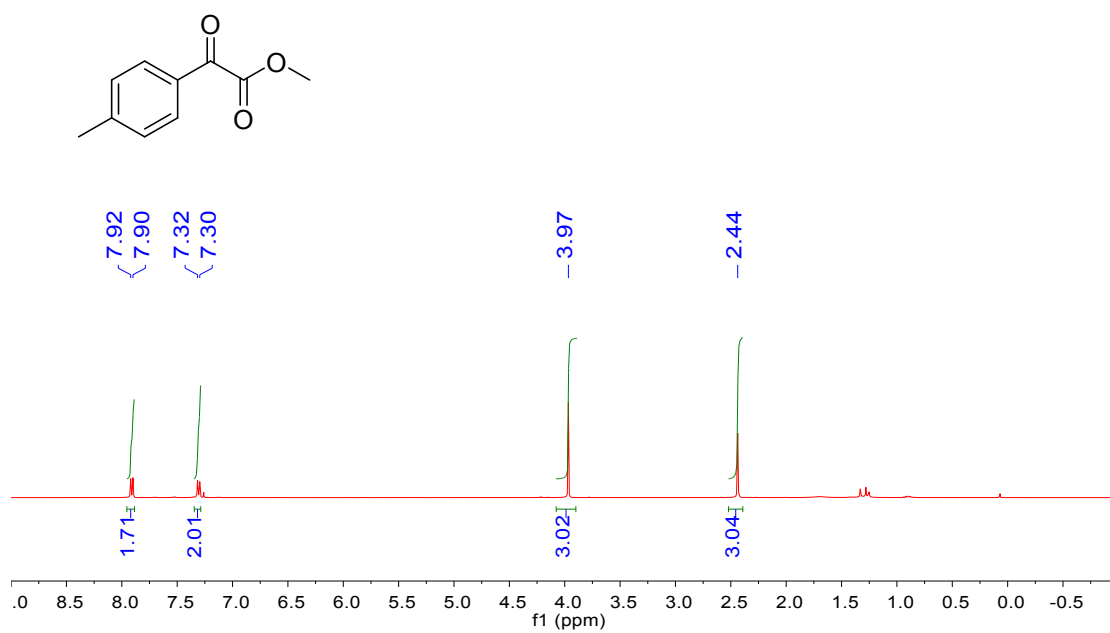

<sup>1</sup>H NMR spectrum of compound 2b

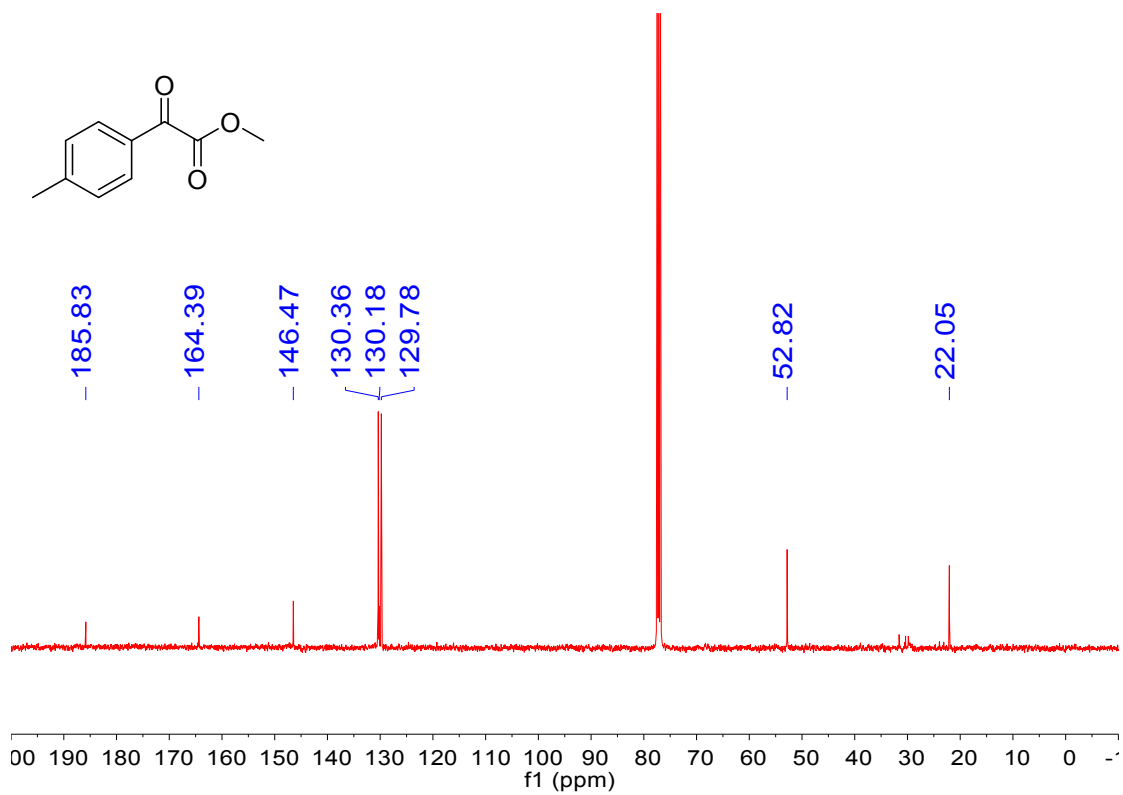

<sup>13</sup>C NMR spectrum of compound 2b

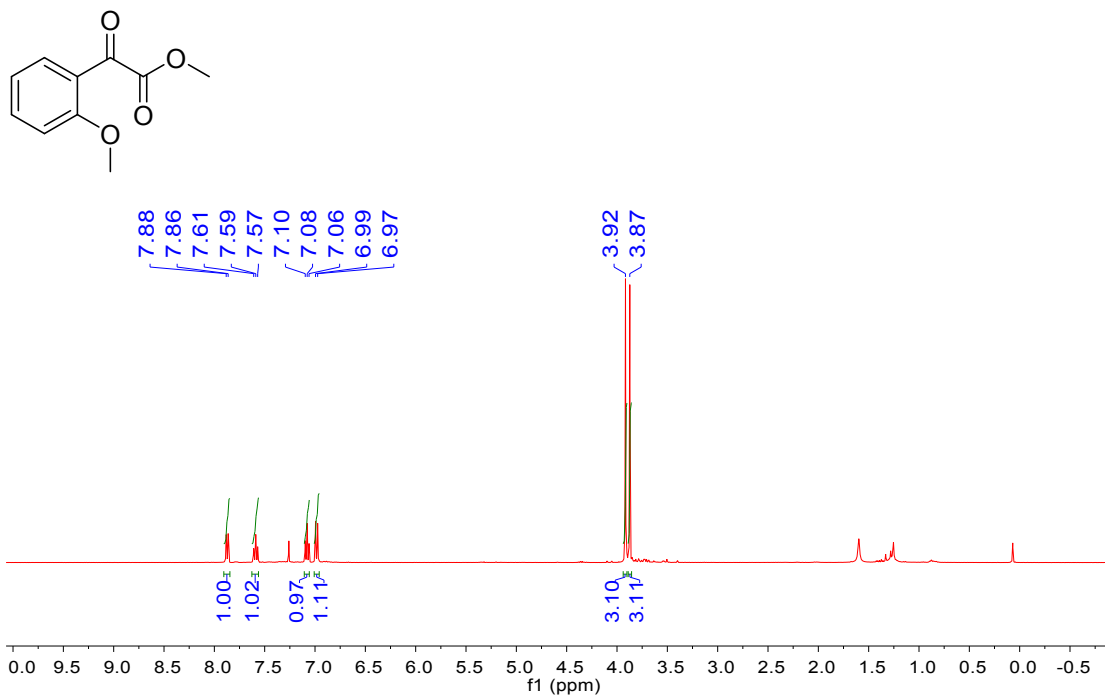

<sup>1</sup>H NMR spectrum of compound 2c

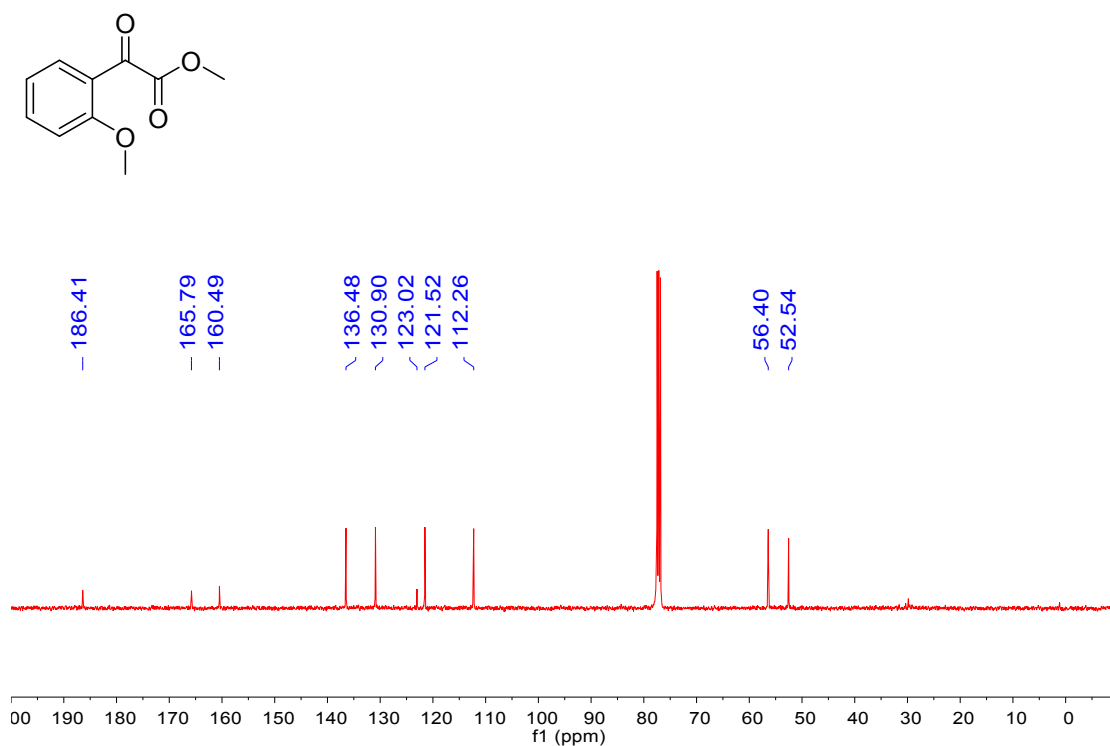

<sup>13</sup>C NMR spectrum of compound 2c

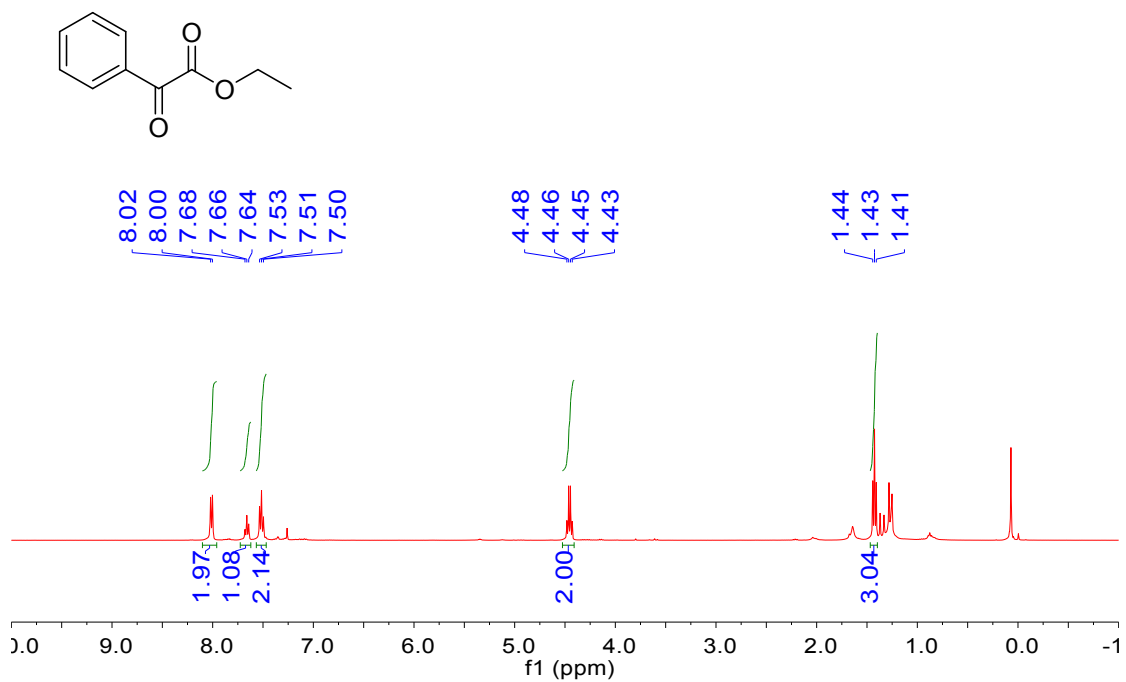

<sup>1</sup>H NMR spectrum of compound 2d

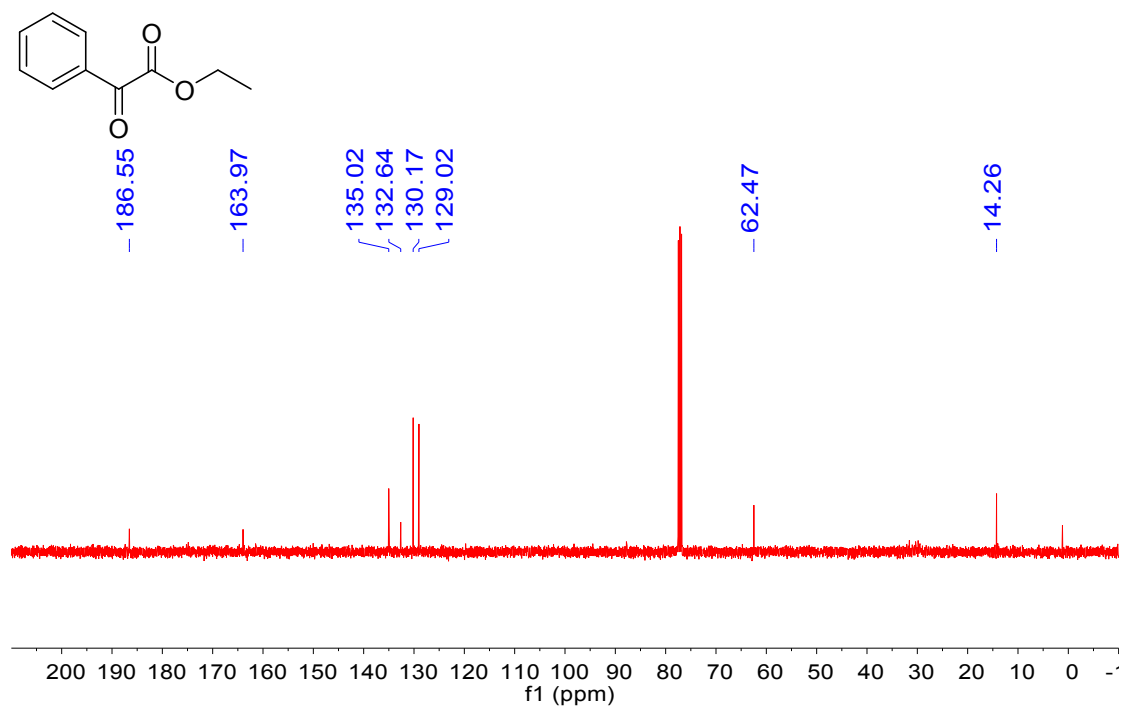

<sup>13</sup>C NMR spectrum of compound 2d

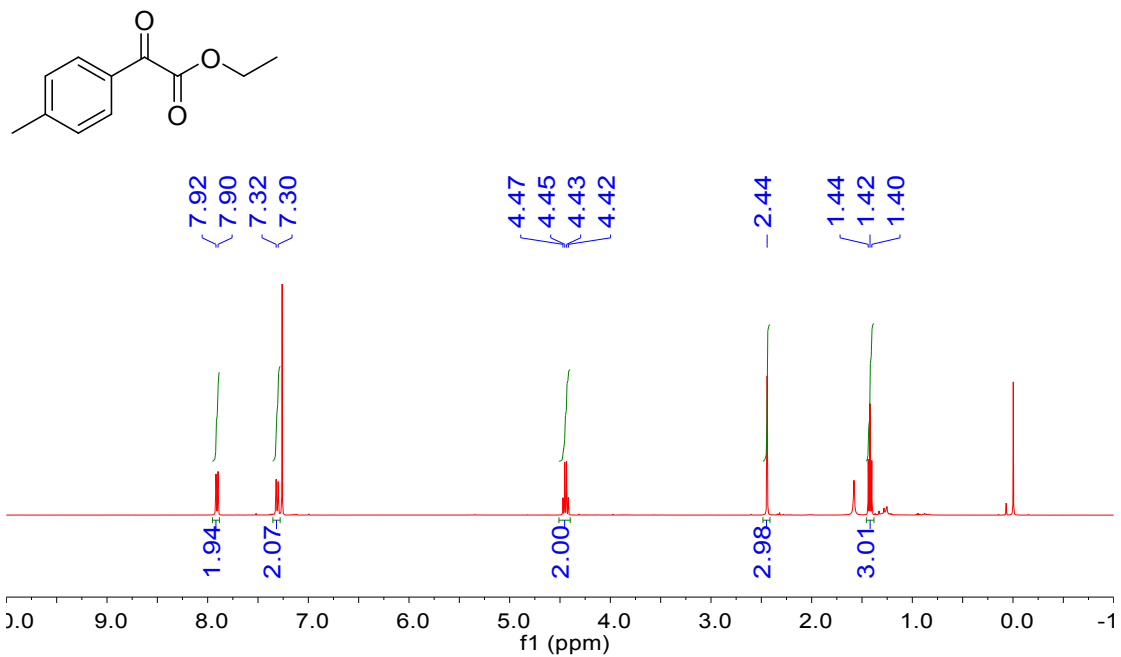

<sup>1</sup>H NMR spectrum of compound 2e

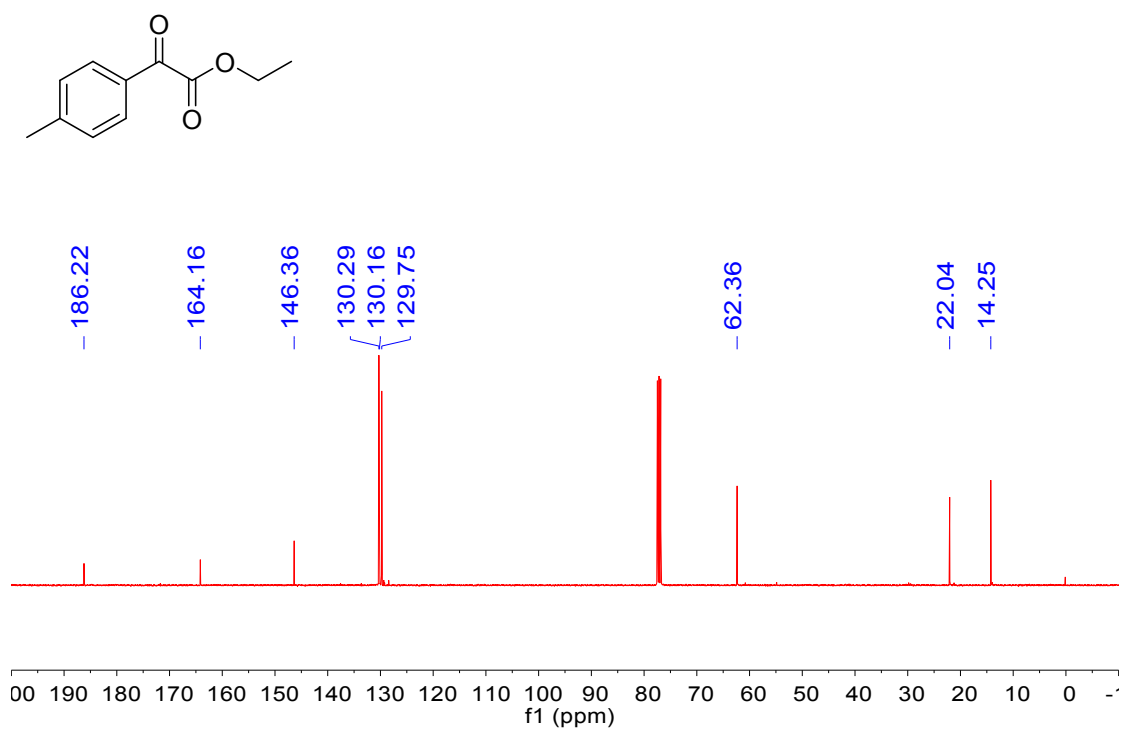

<sup>13</sup>C NMR spectrum of compound 2e



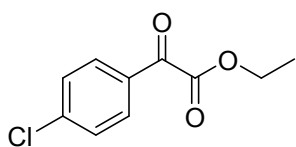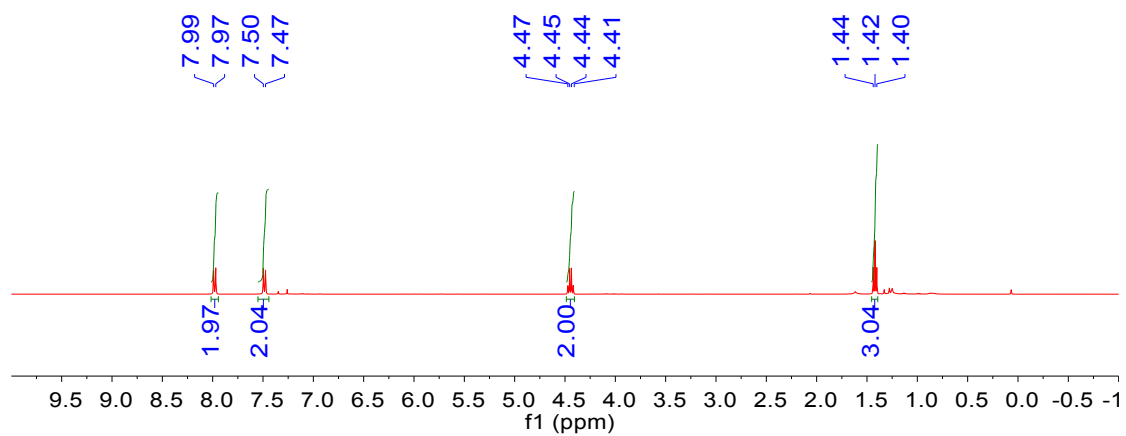

<sup>1</sup>H NMR spectrum of compound 2f

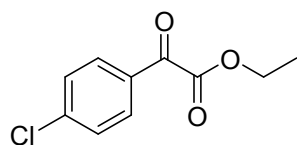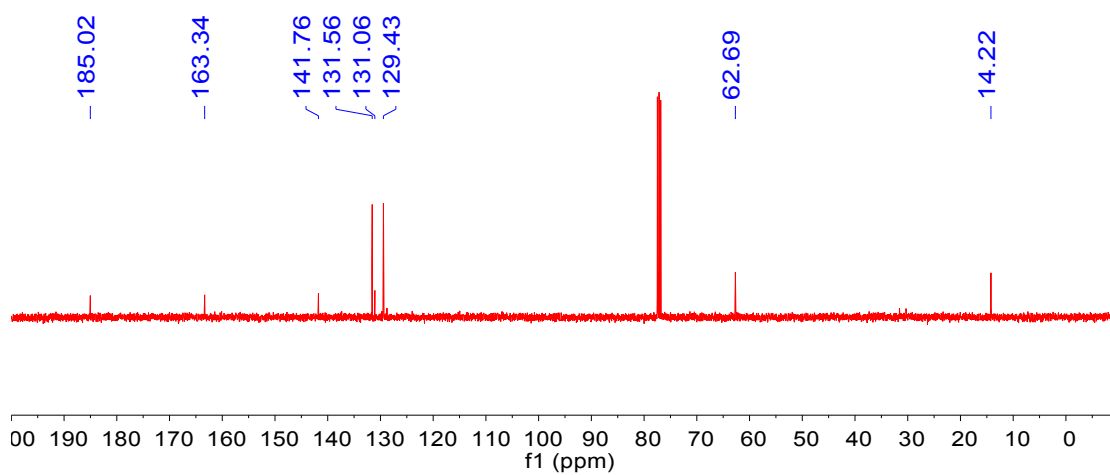

<sup>13</sup>C NMR spectrum of compound 2f

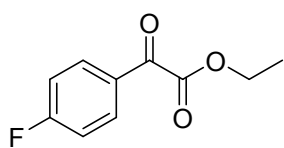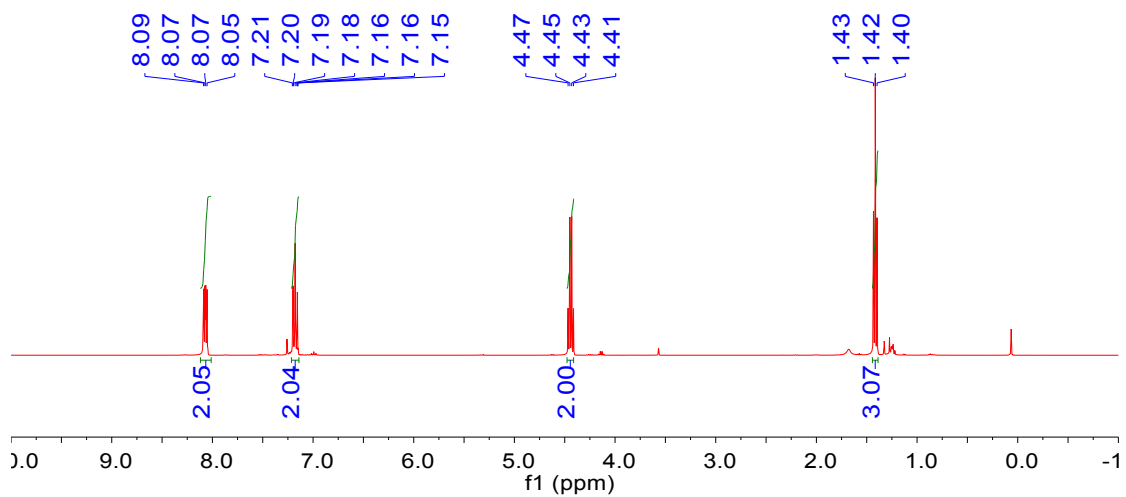

<sup>1</sup>H NMR spectrum of compound 2g

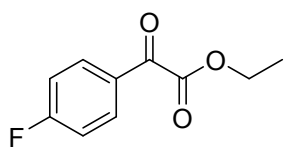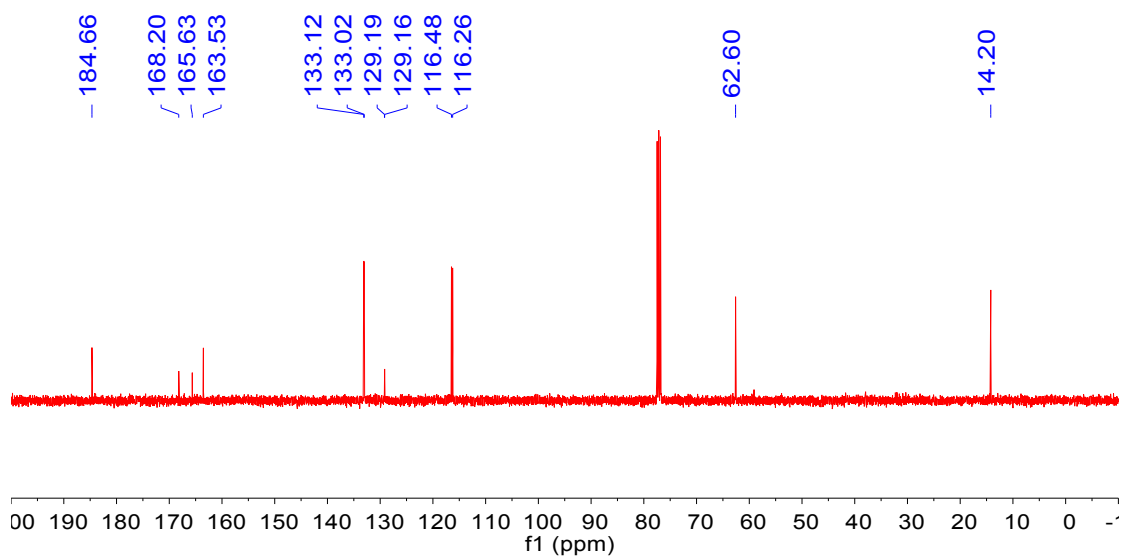

<sup>13</sup>C NMR spectrum of compound 2g

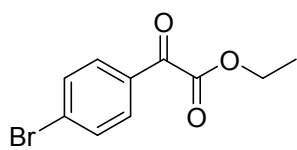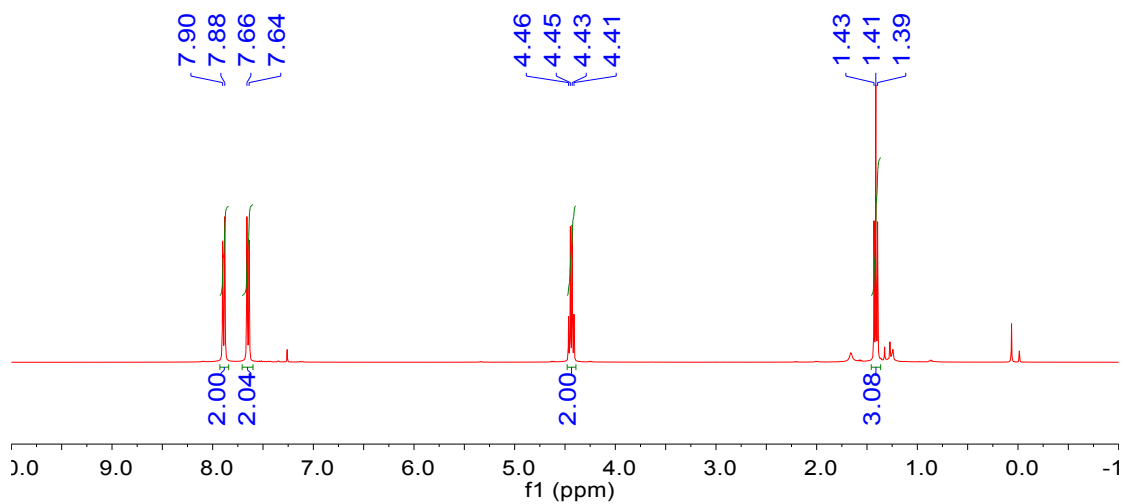

<sup>1</sup>H NMR spectrum of compound 2h

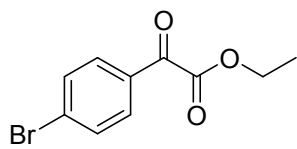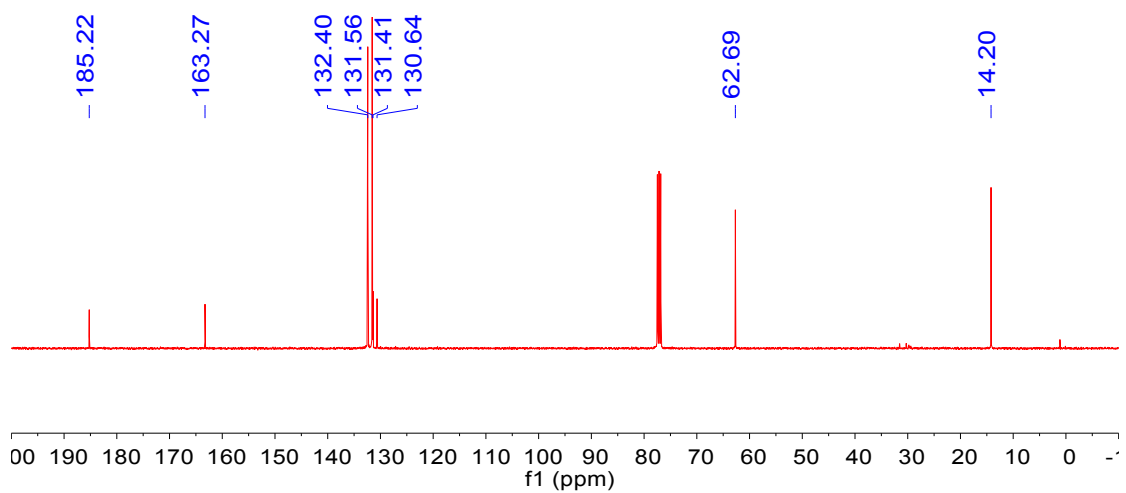

<sup>13</sup>C NMR spectrum of compound 2h

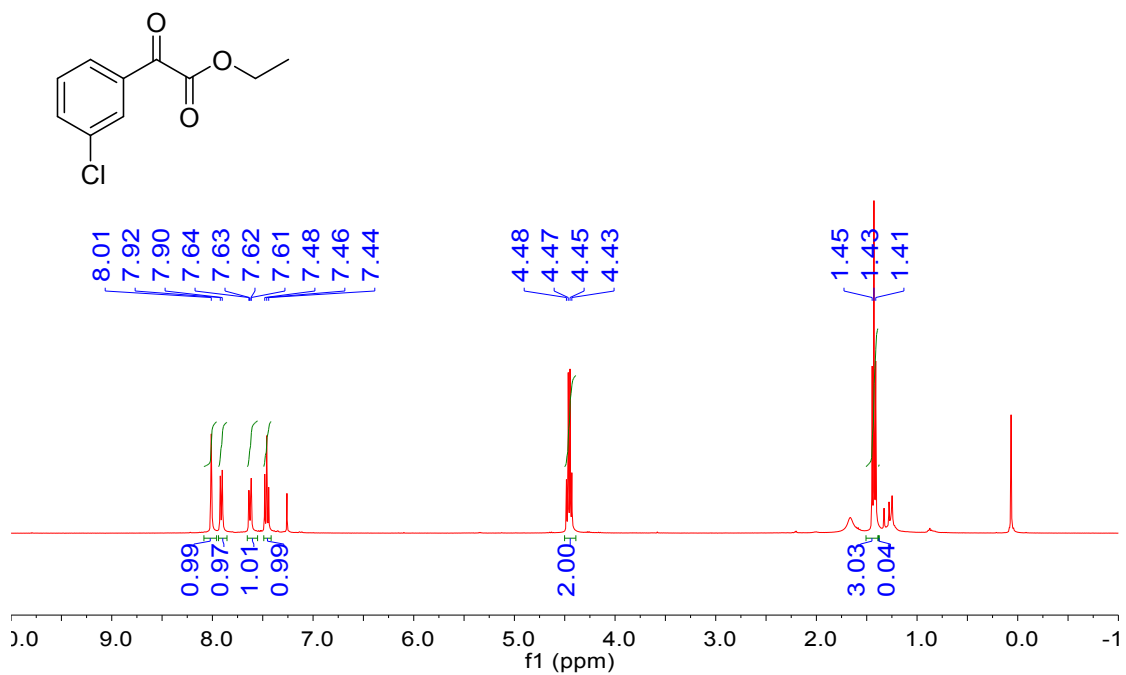

<sup>1</sup>H NMR spectrum of compound 2i

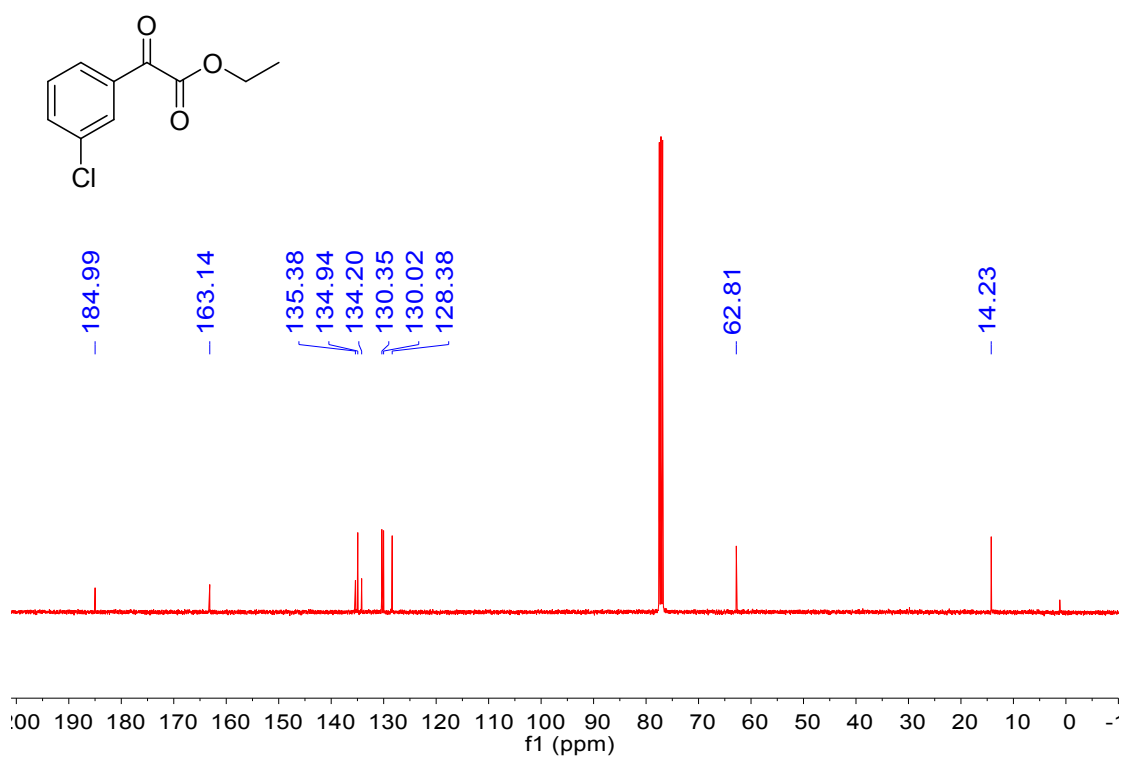

<sup>13</sup>C NMR spectrum of compound 2i

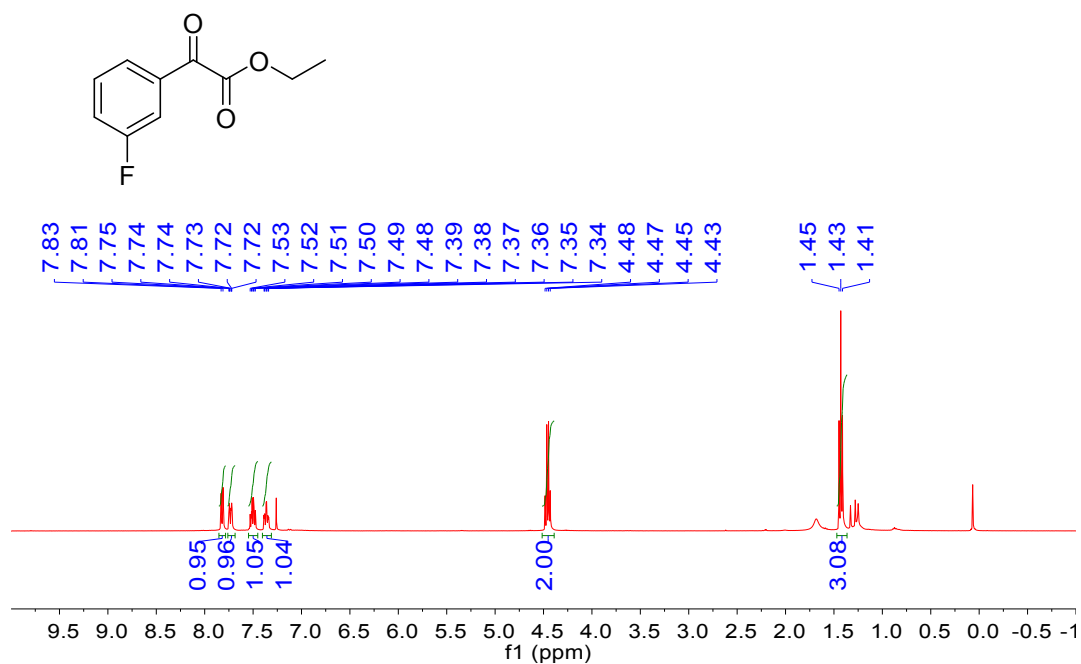

<sup>1</sup>H NMR spectrum of compound 2j

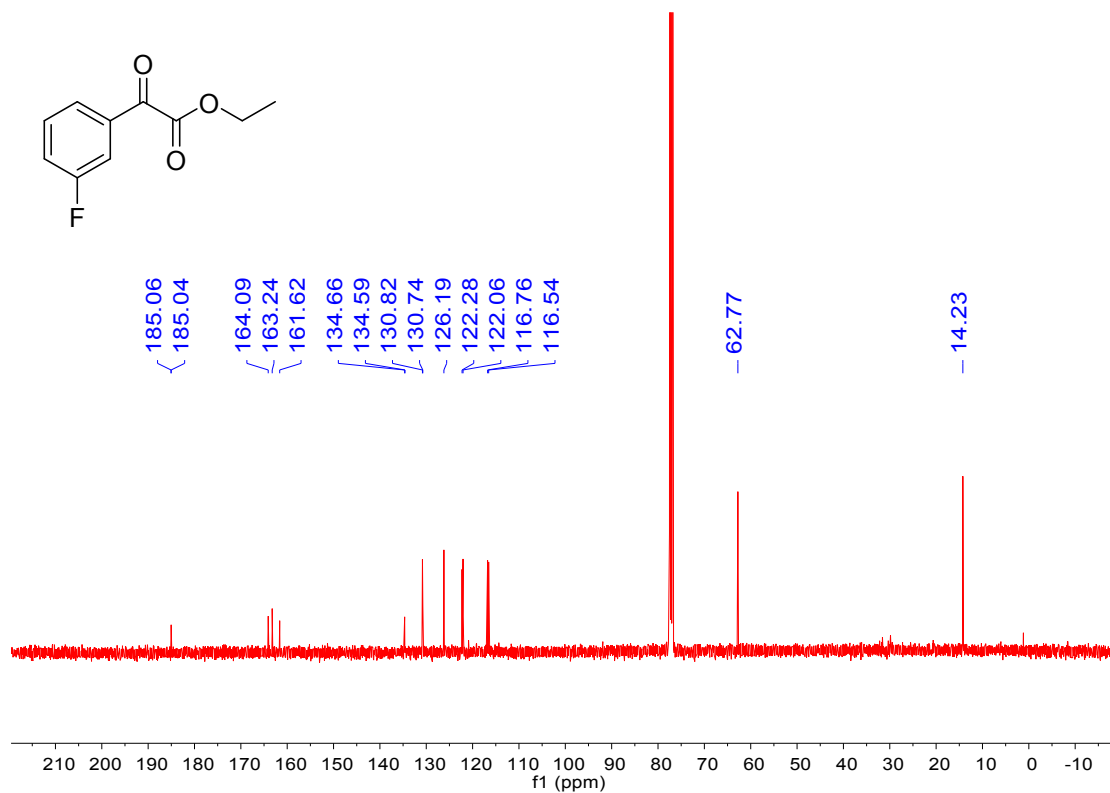

<sup>13</sup>C NMR spectrum of compound 2j

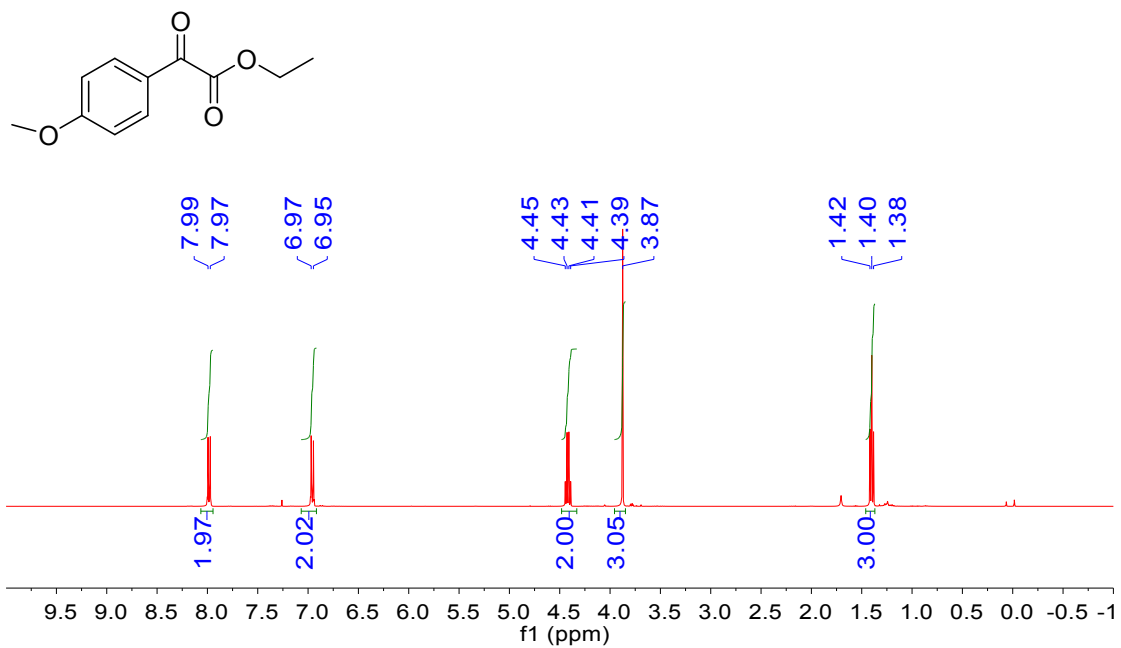

<sup>1</sup>H NMR spectrum of compound 2k

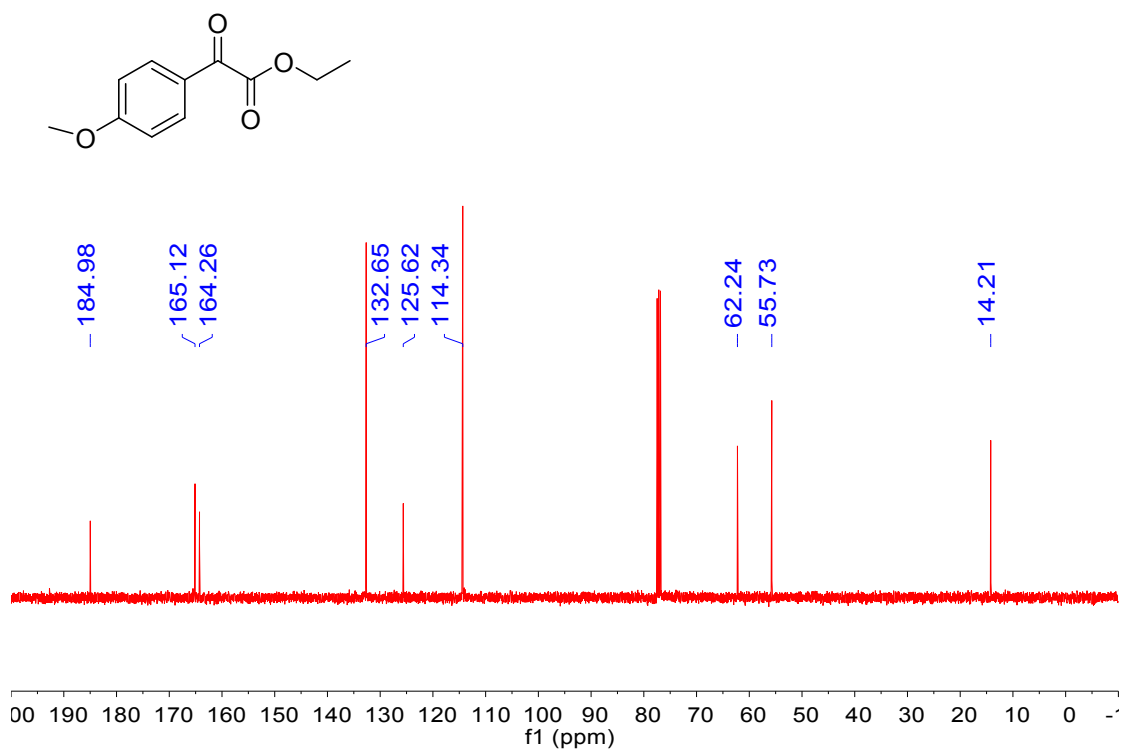

<sup>13</sup>C NMR spectrum of compound 2k

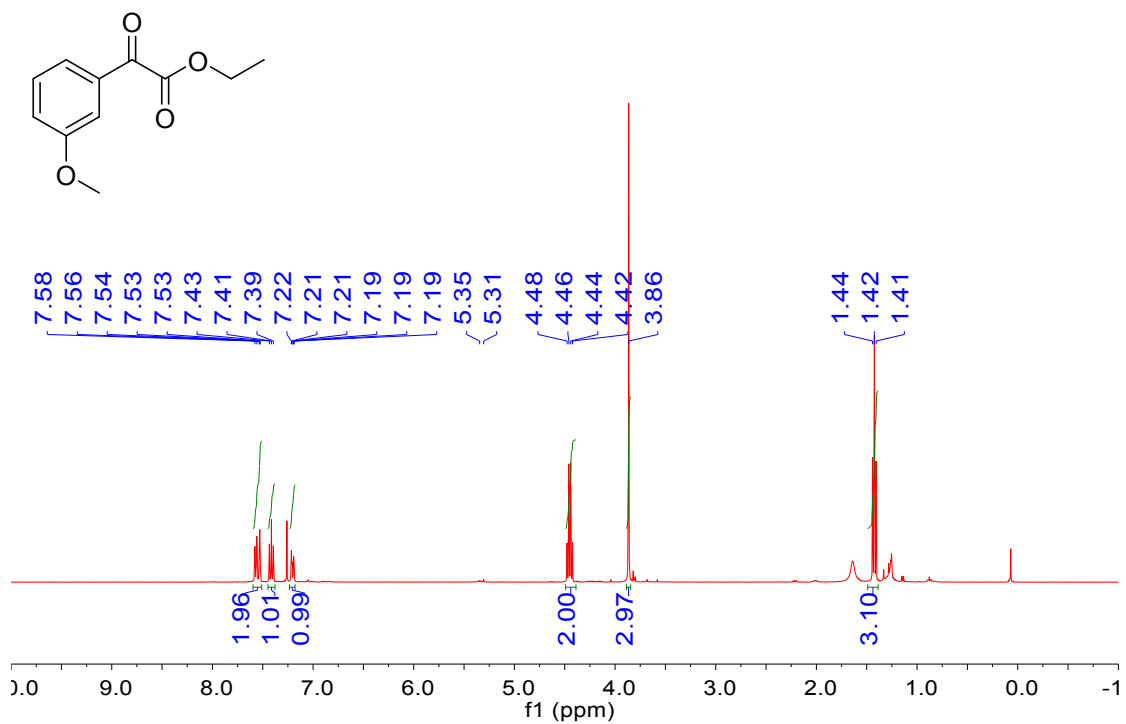

<sup>1</sup>H NMR spectrum of compound 21

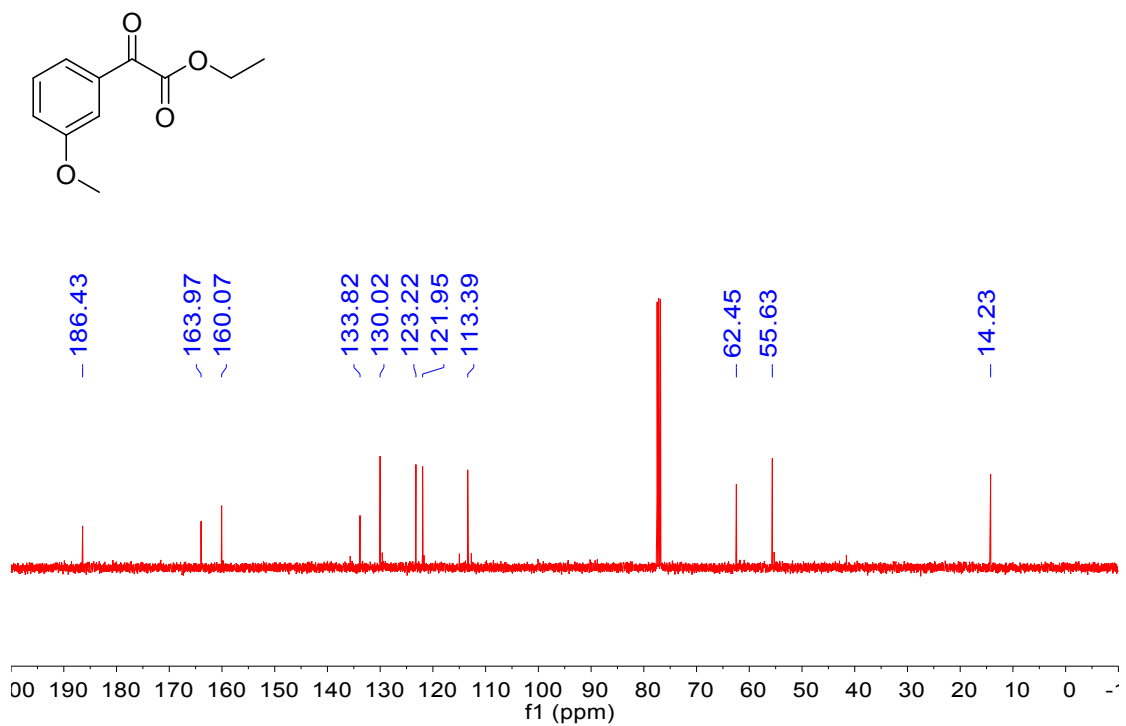

<sup>13</sup>C NMR spectrum of compound 21

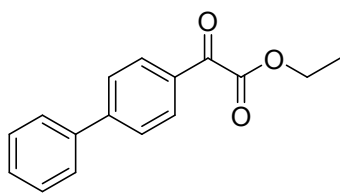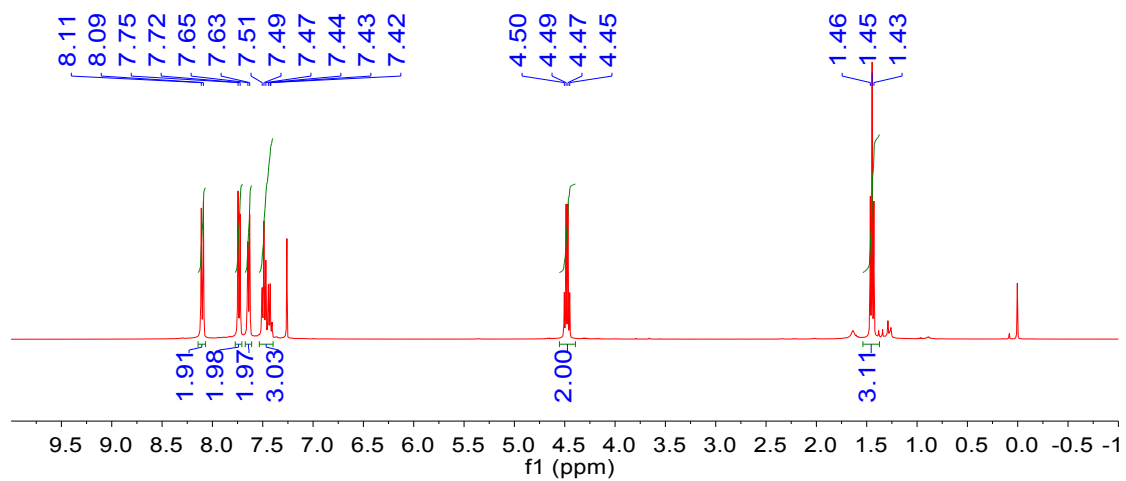

<sup>1</sup>H NMR spectrum of compound 2m

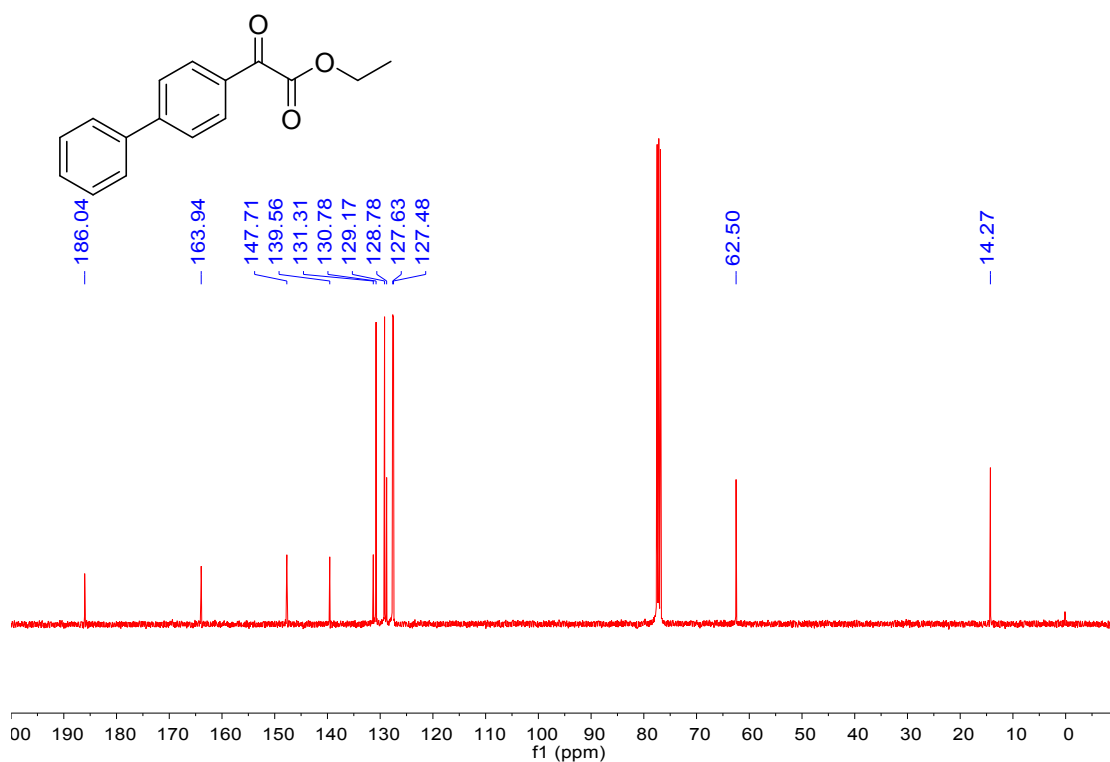

<sup>13</sup>C NMR spectrum of compound 2m



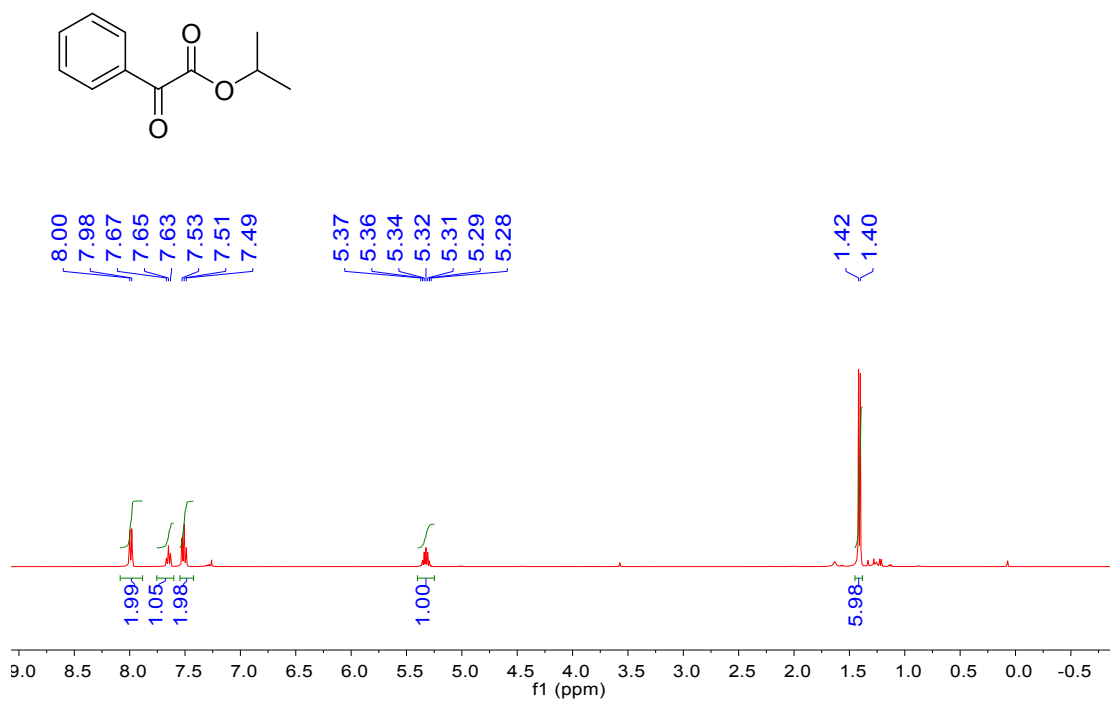

<sup>1</sup>H NMR spectrum of compound 2n

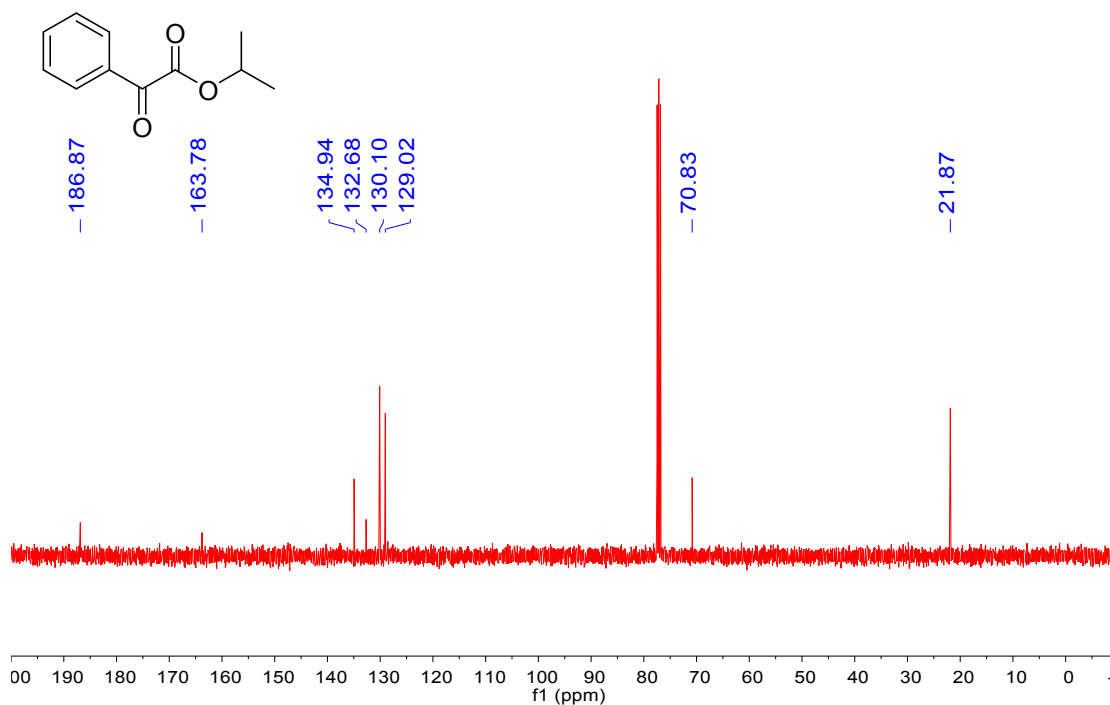

<sup>13</sup>C NMR spectrum of compound 2n

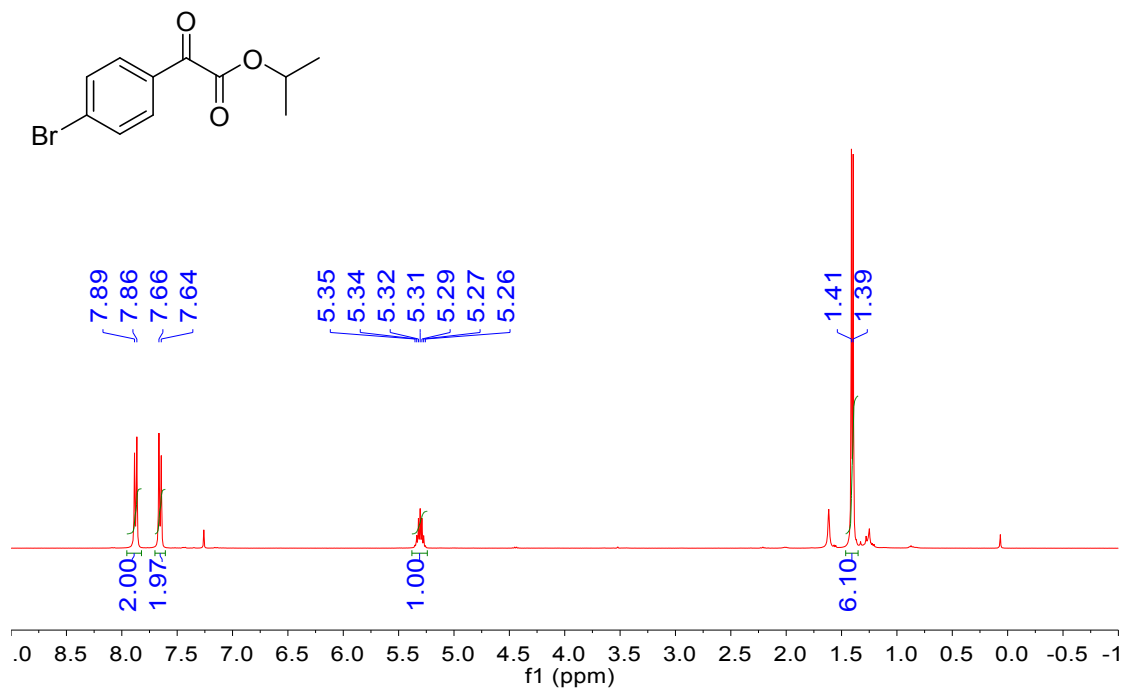

<sup>1</sup>H NMR spectrum of compound 2o

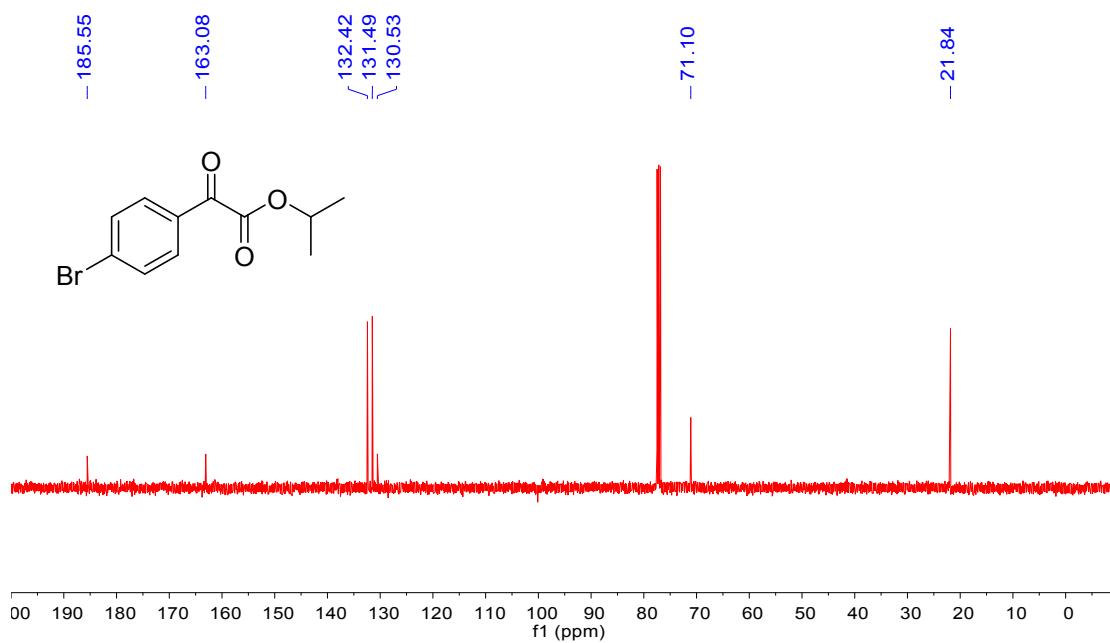

<sup>13</sup>C NMR spectrum of compound 2o

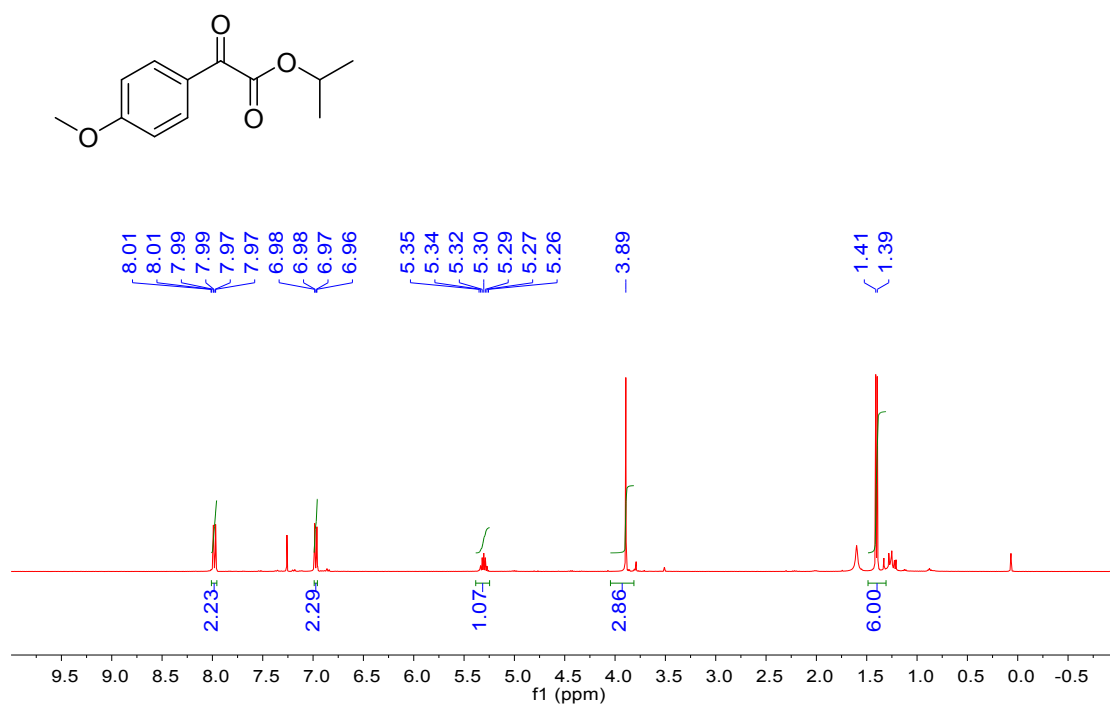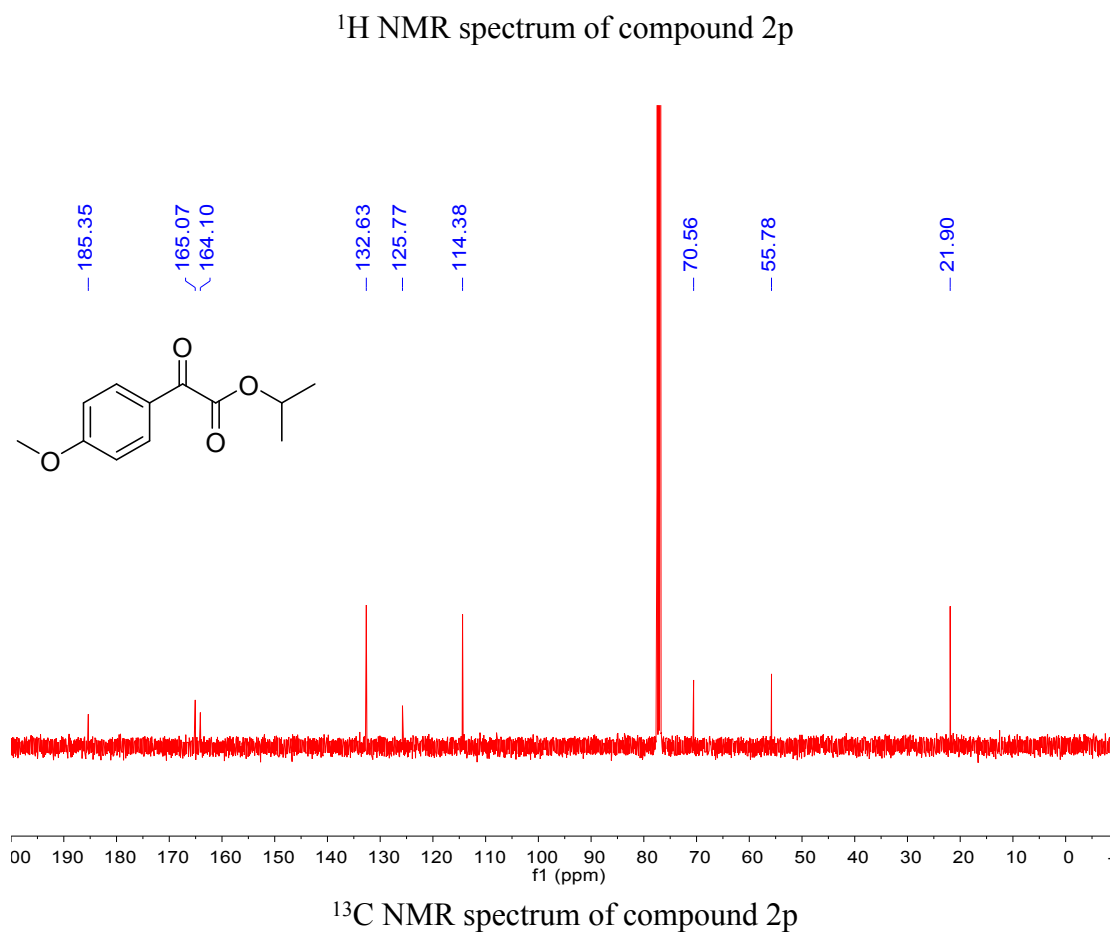

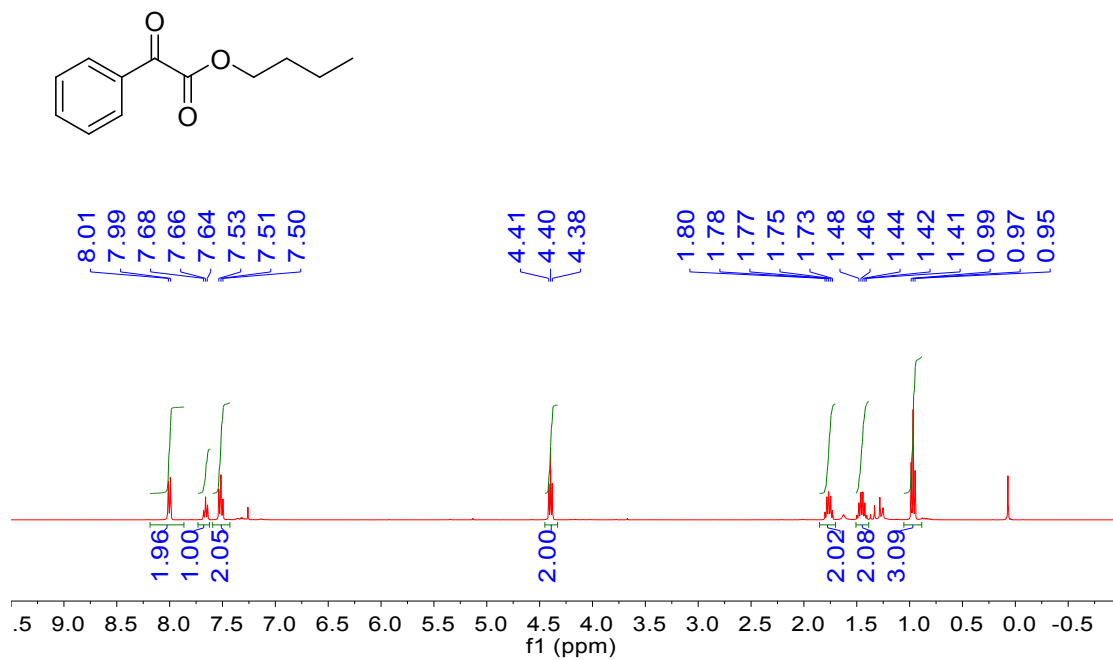

<sup>1</sup>H NMR spectrum of compound 2q

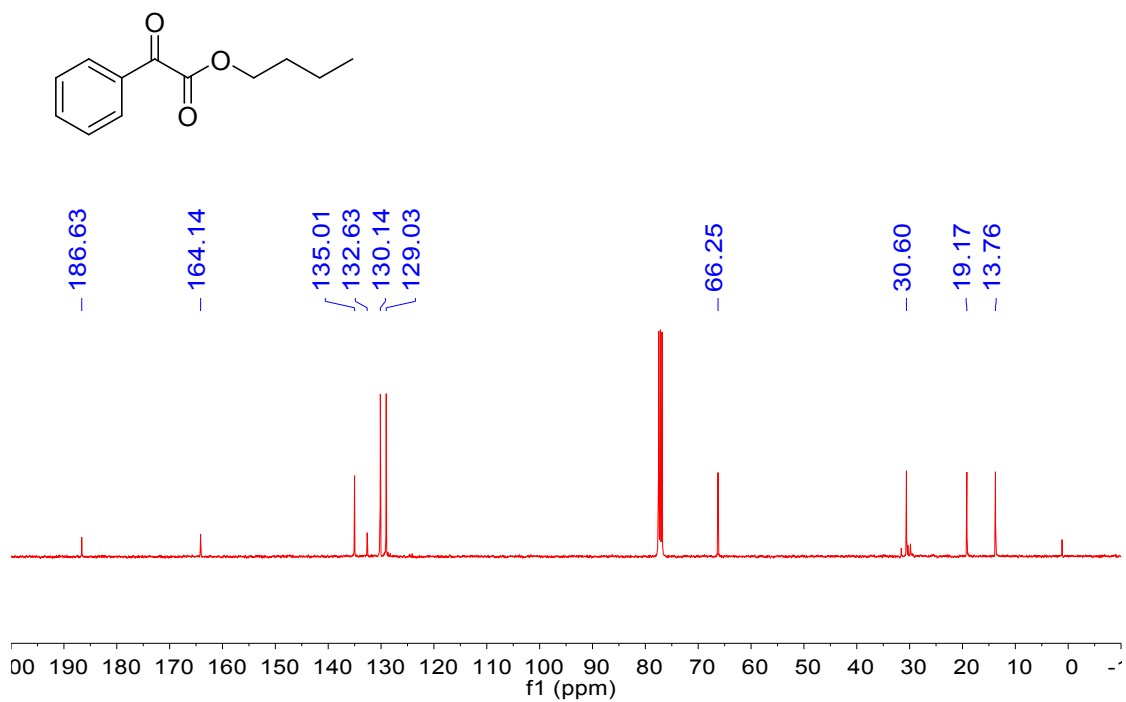

<sup>13</sup>C NMR spectrum of compound 2q

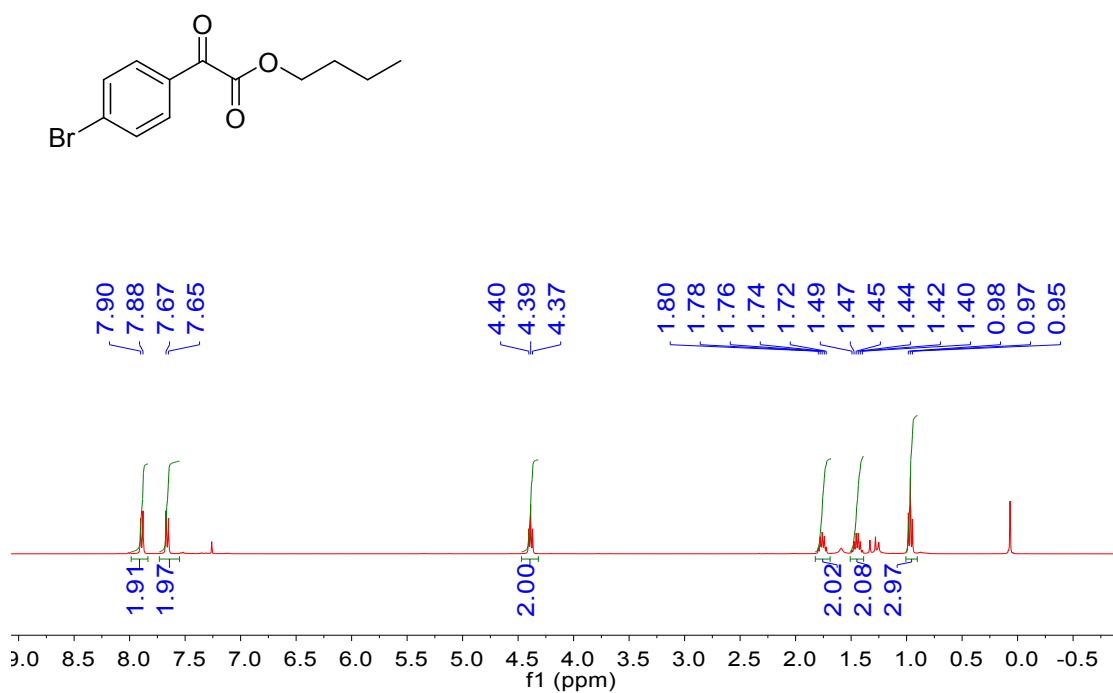

<sup>1</sup>H NMR spectrum of compound 2r

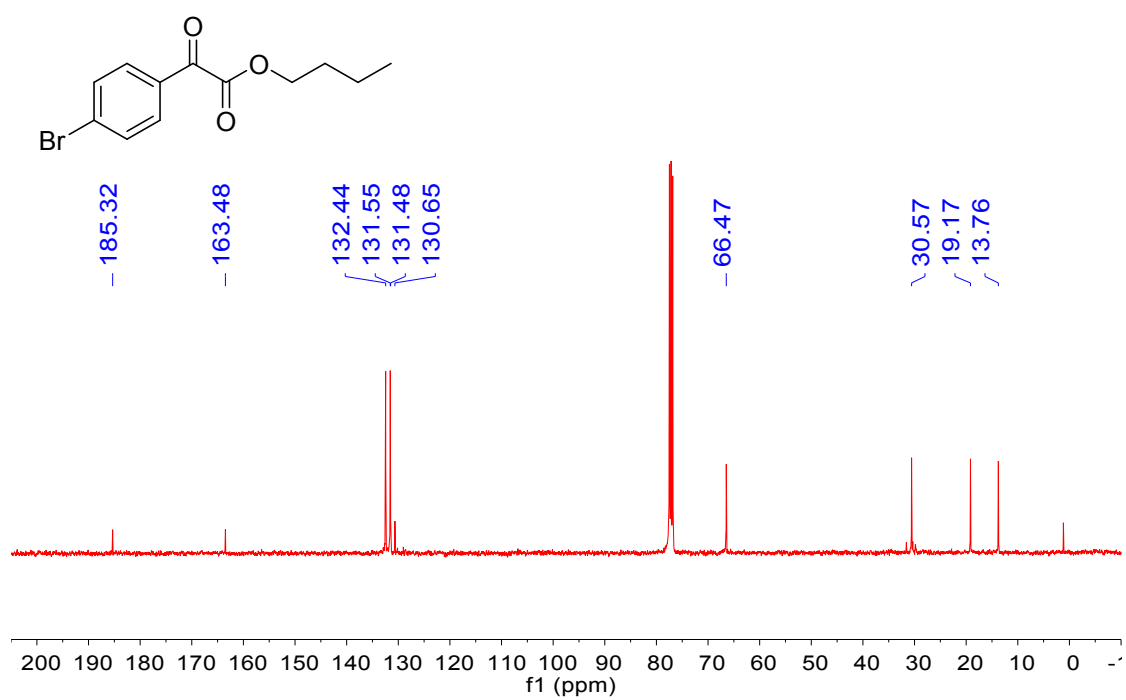

<sup>13</sup>C NMR spectrum of compound 2r

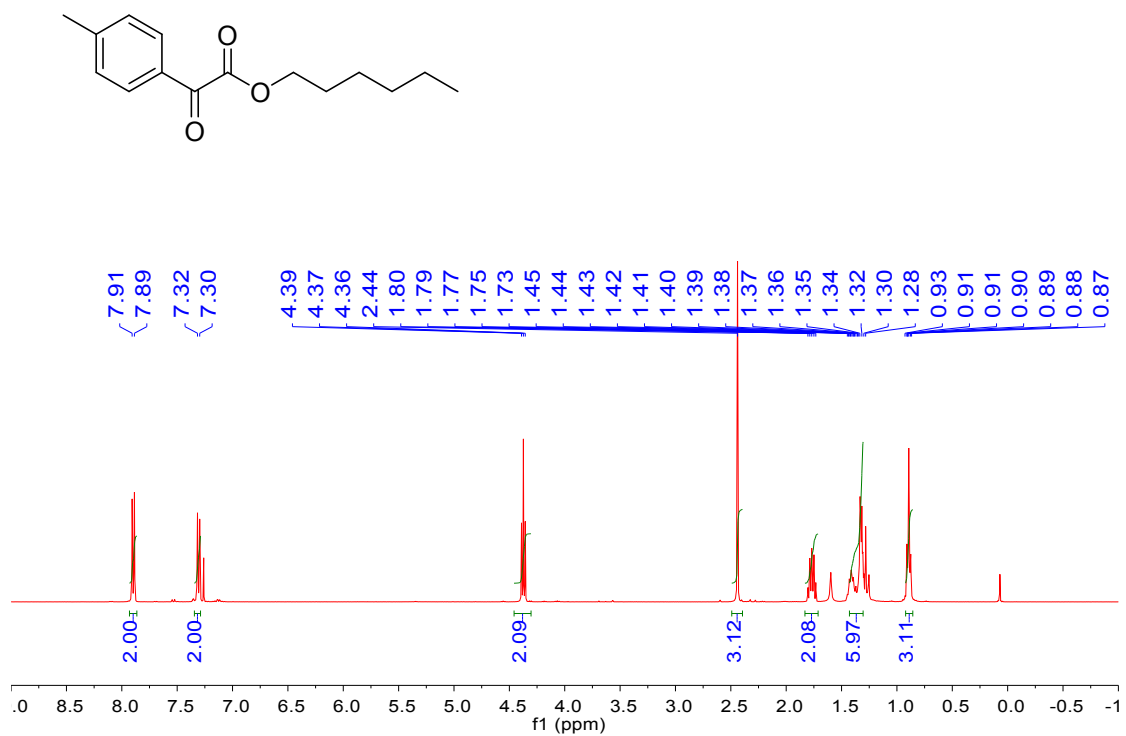

<sup>1</sup>H NMR spectrum of compound 2s

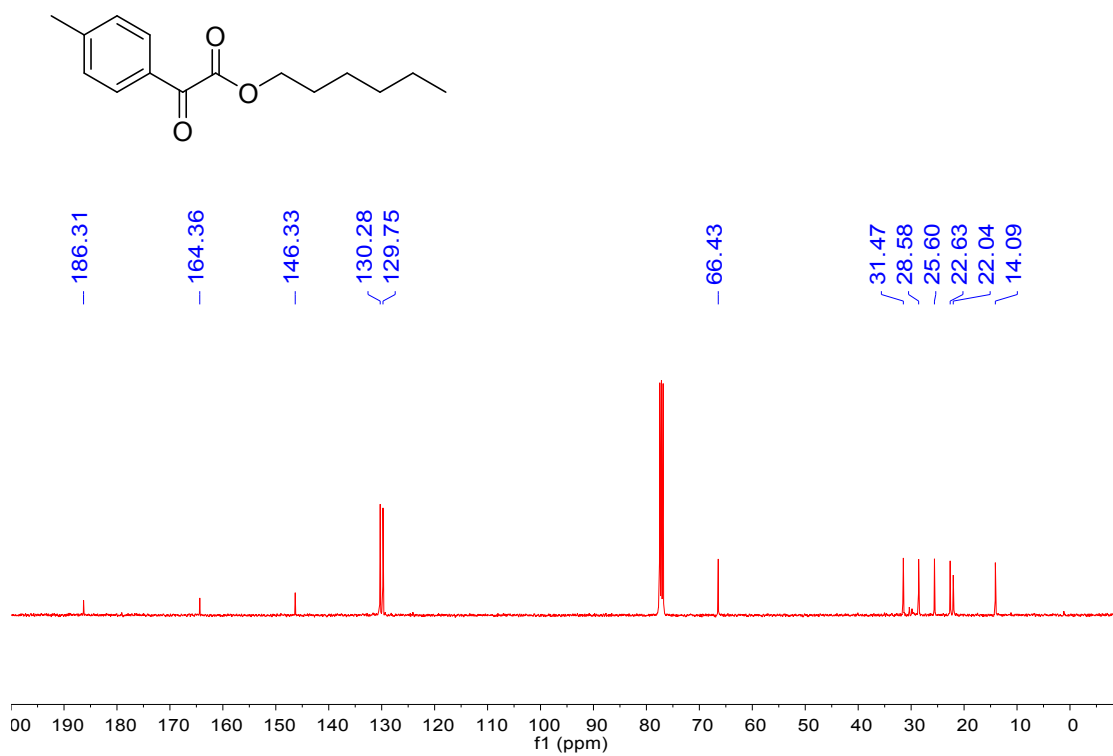

<sup>13</sup>C NMR spectrum of compound 2s

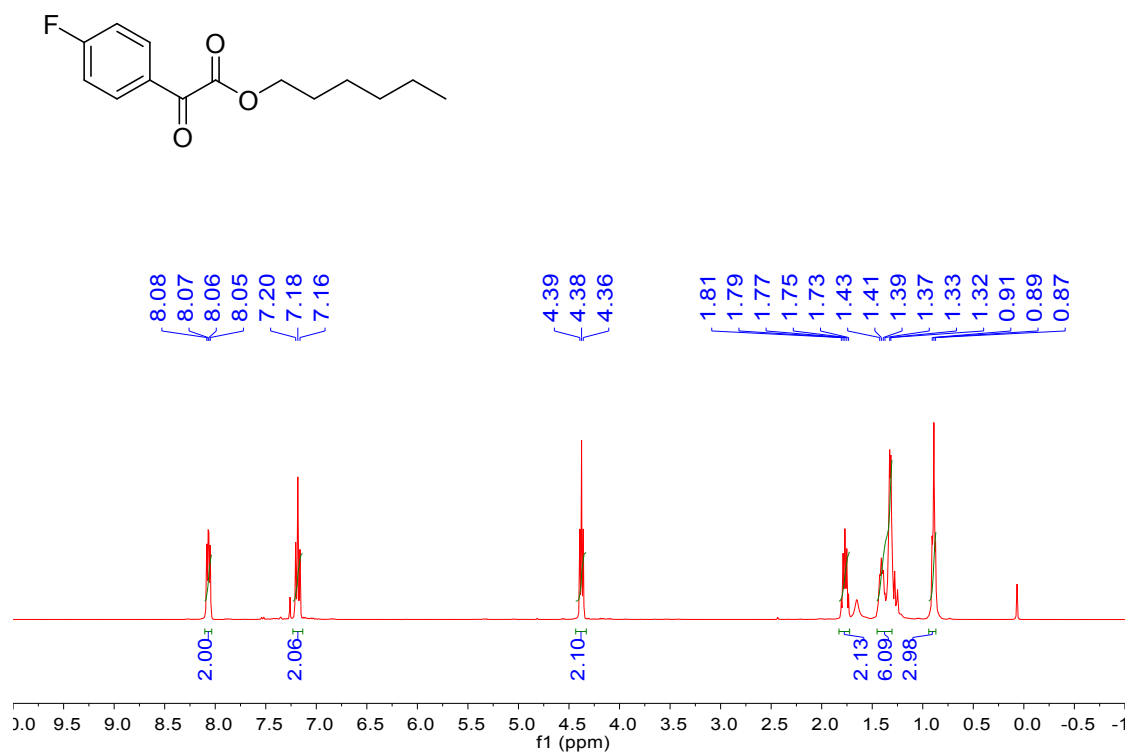

<sup>1</sup>H NMR spectrum of compound 2t

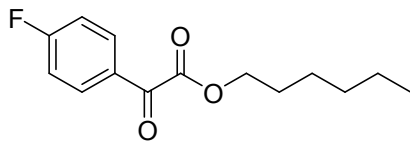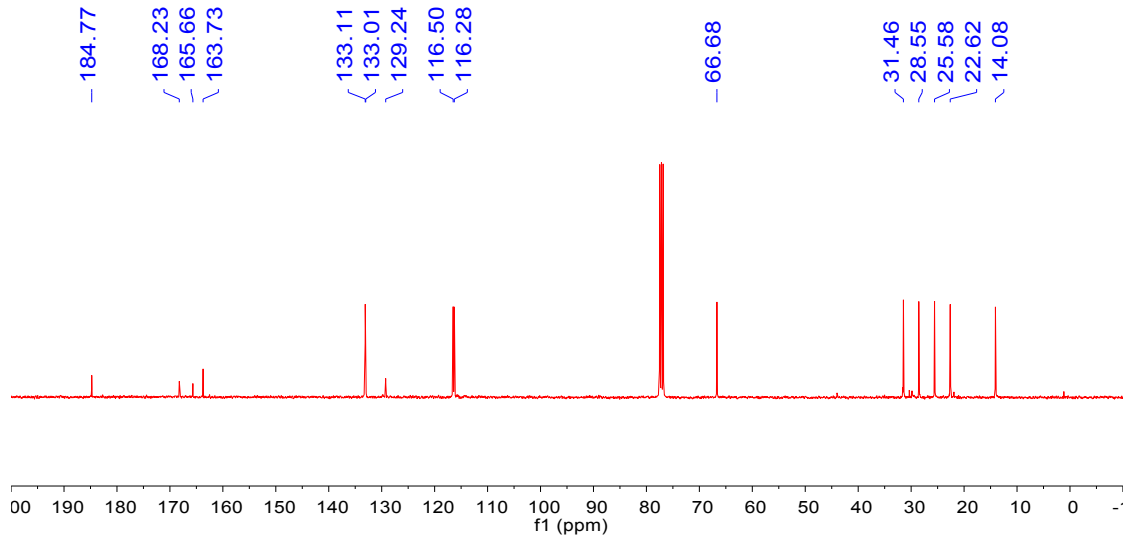

$^{13}\text{C}$  NMR spectrum of compound 2t

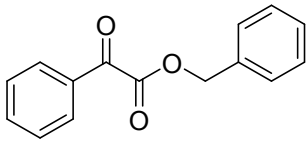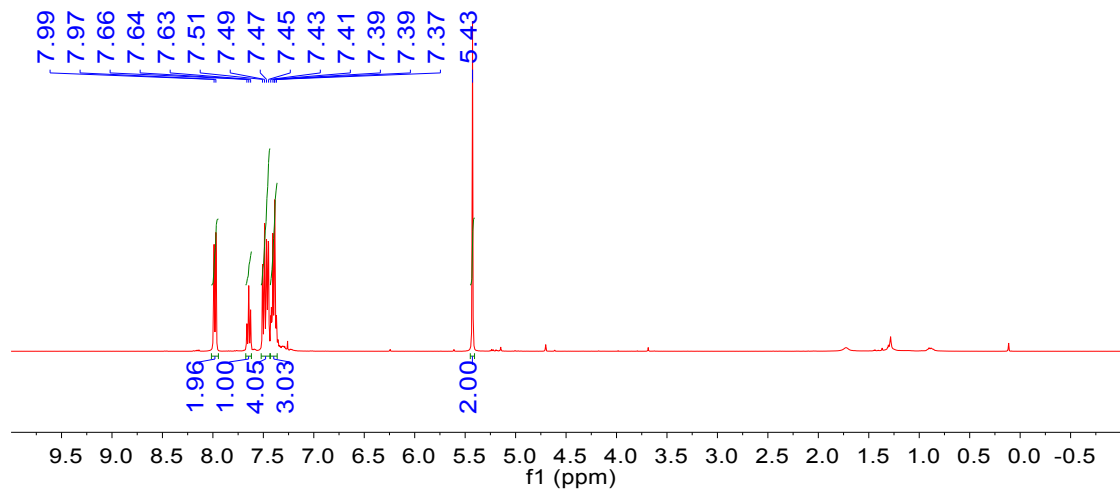

$^1\text{H}$  NMR spectrum of compound 2u



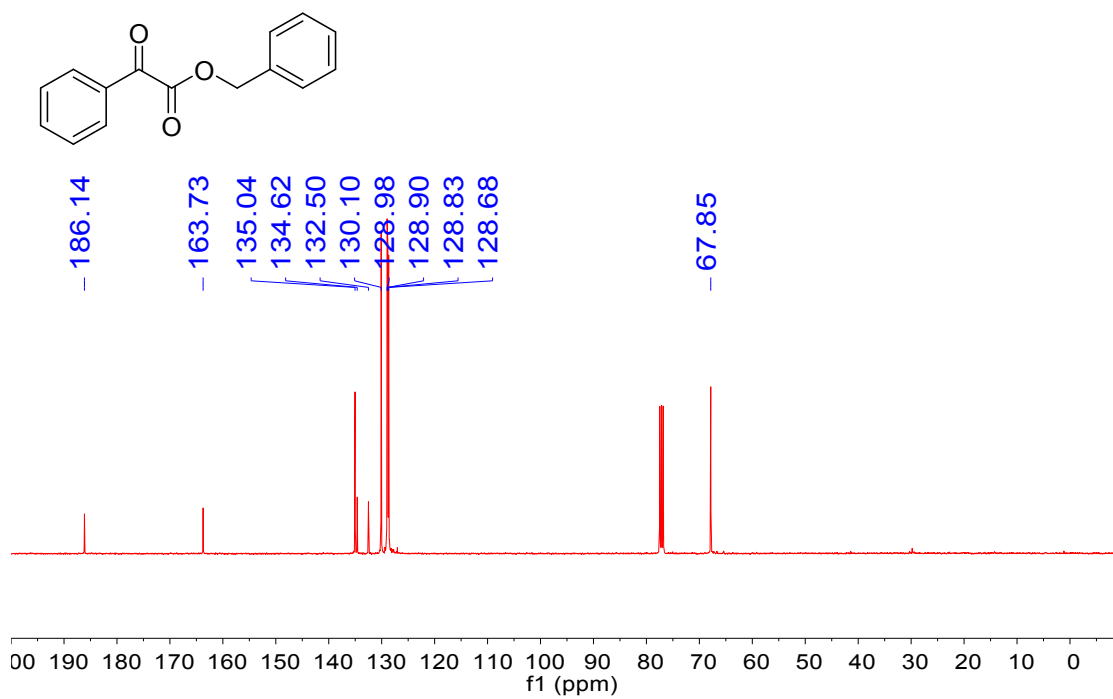

<sup>13</sup>C NMR spectrum of compound 2u

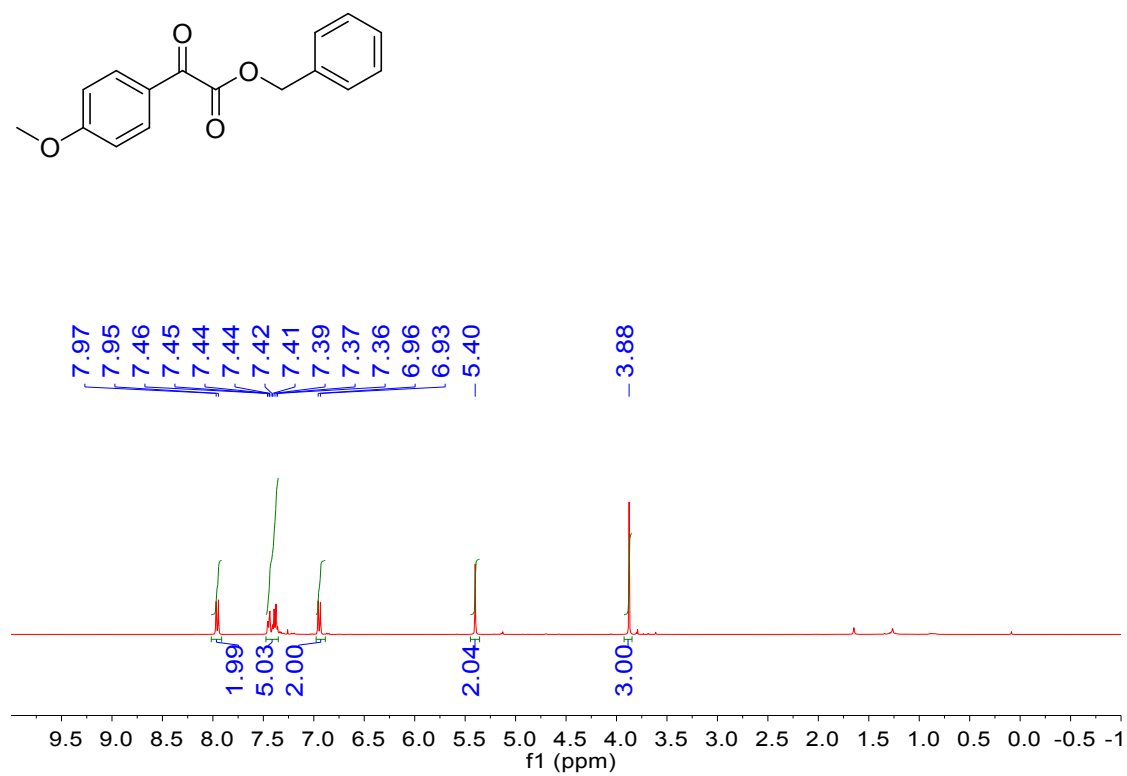

<sup>1</sup>H NMR spectrum of compound 2v

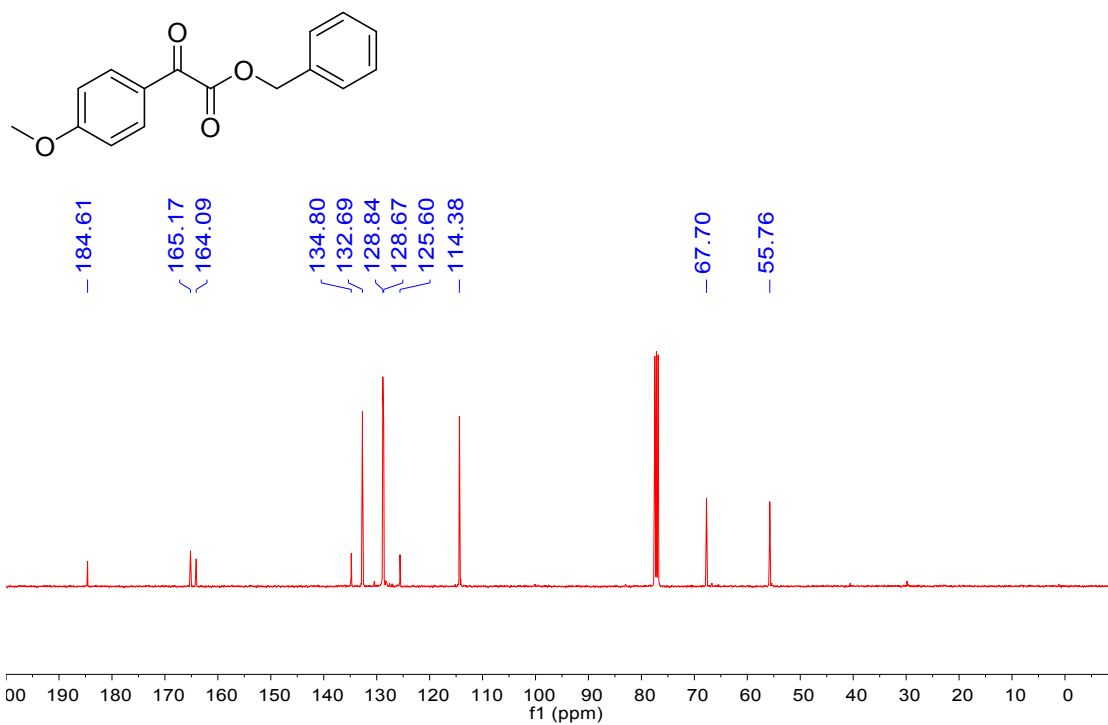

<sup>13</sup>C NMR spectrum of compound 2v

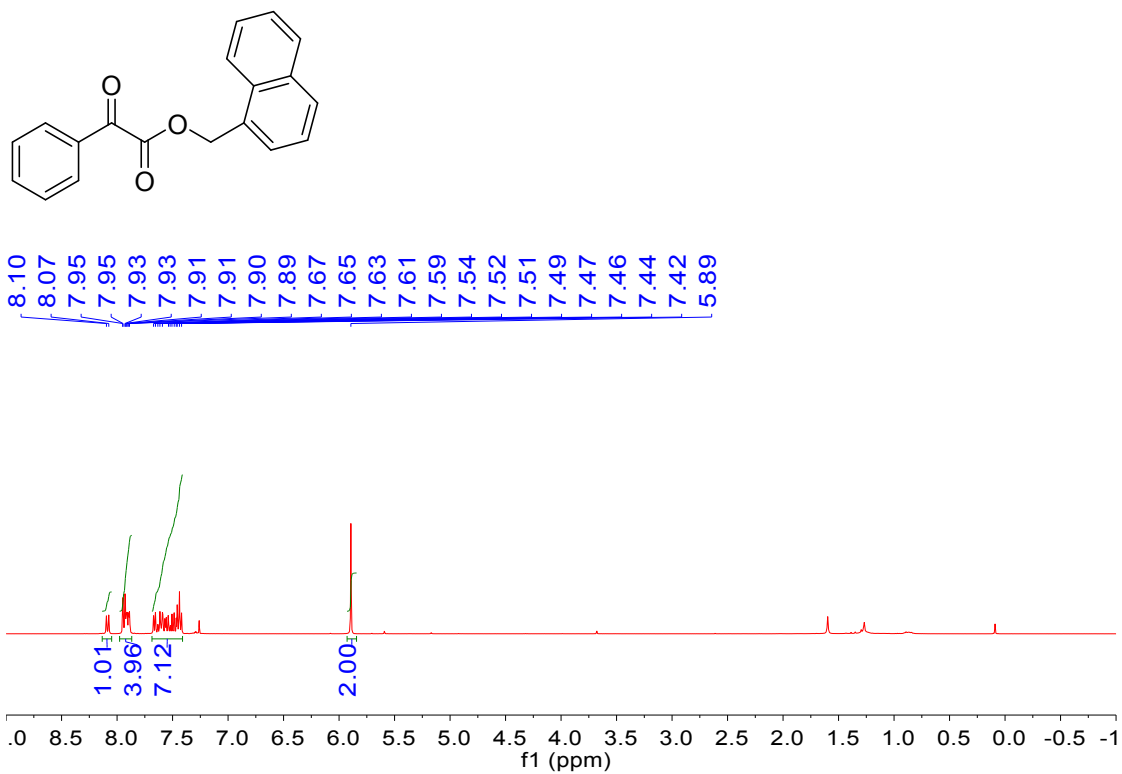

<sup>1</sup>H NMR spectrum of compound 2w

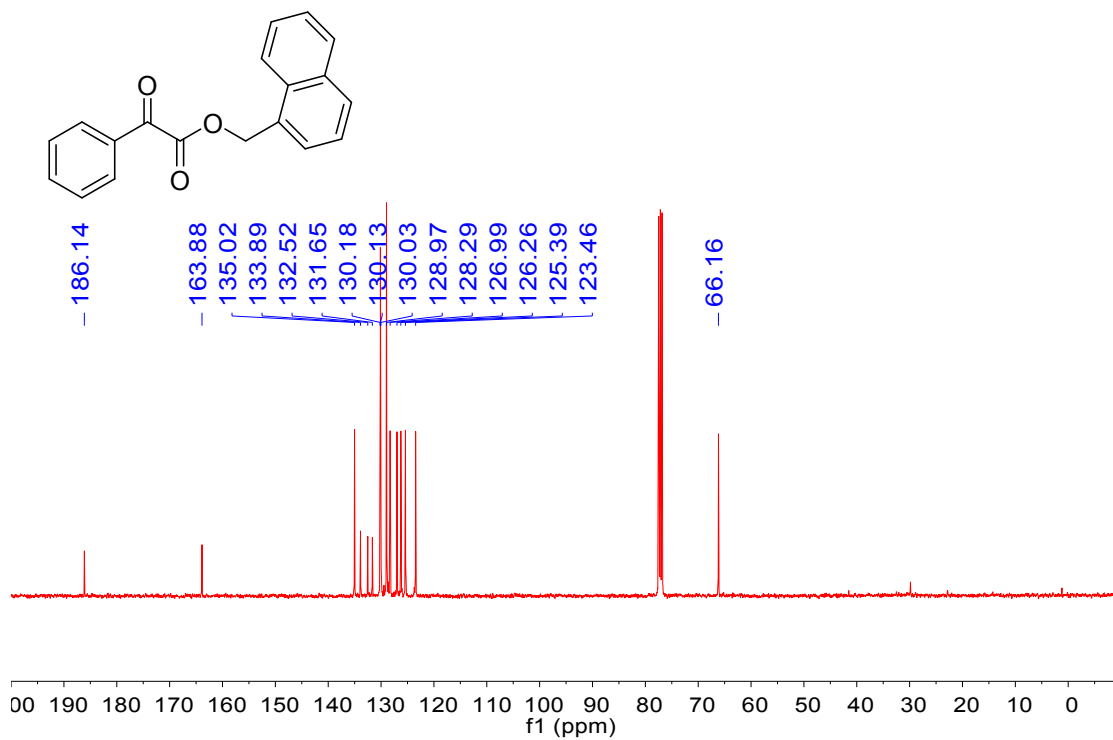

<sup>13</sup>C NMR spectrum of compound 2w

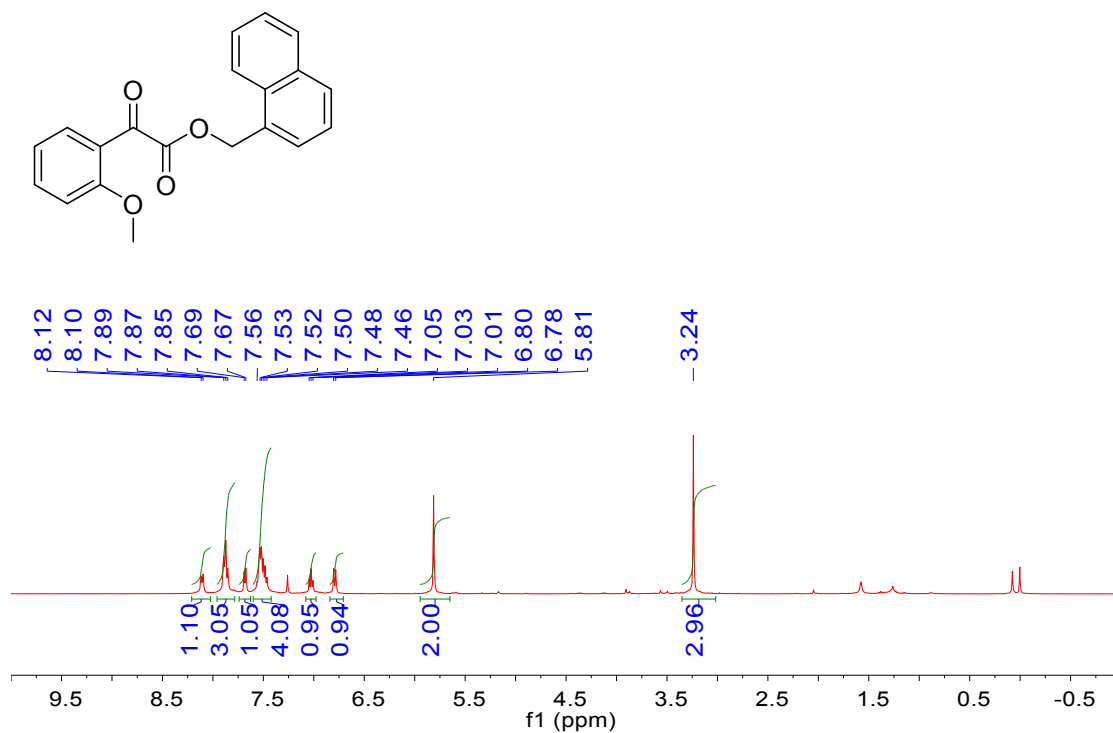

<sup>1</sup>H NMR spectrum of compound 2x

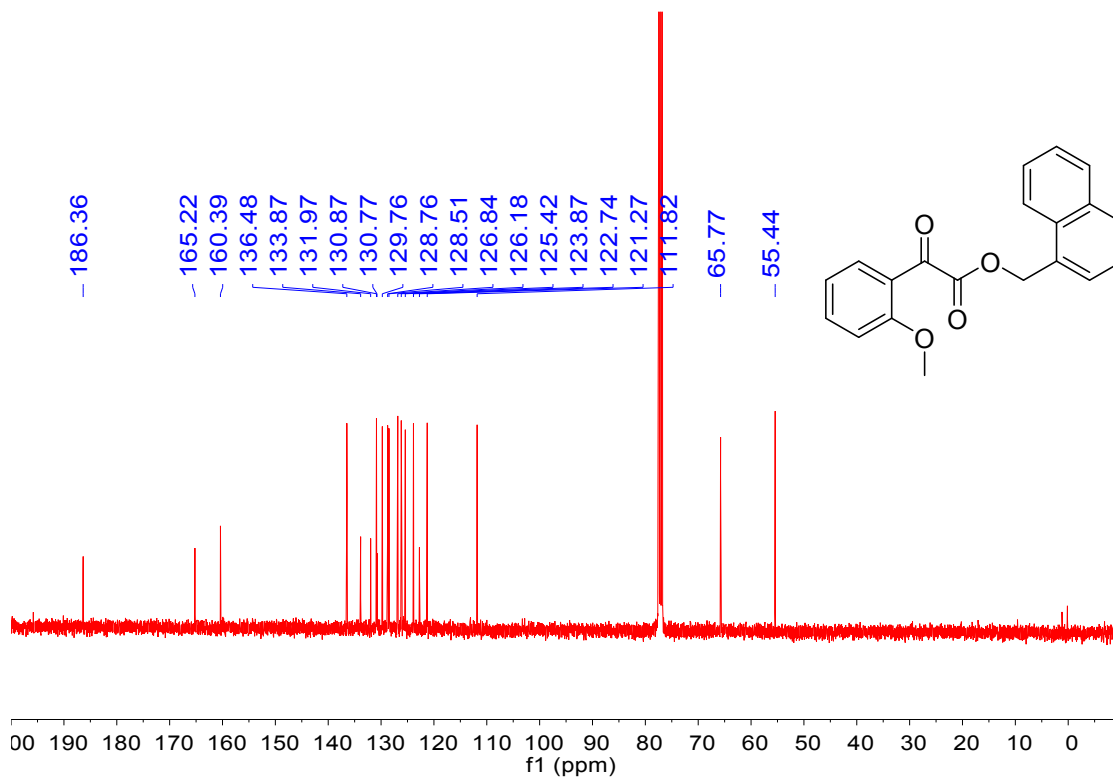

<sup>13</sup>C NMR spectrum of compound 2x

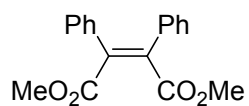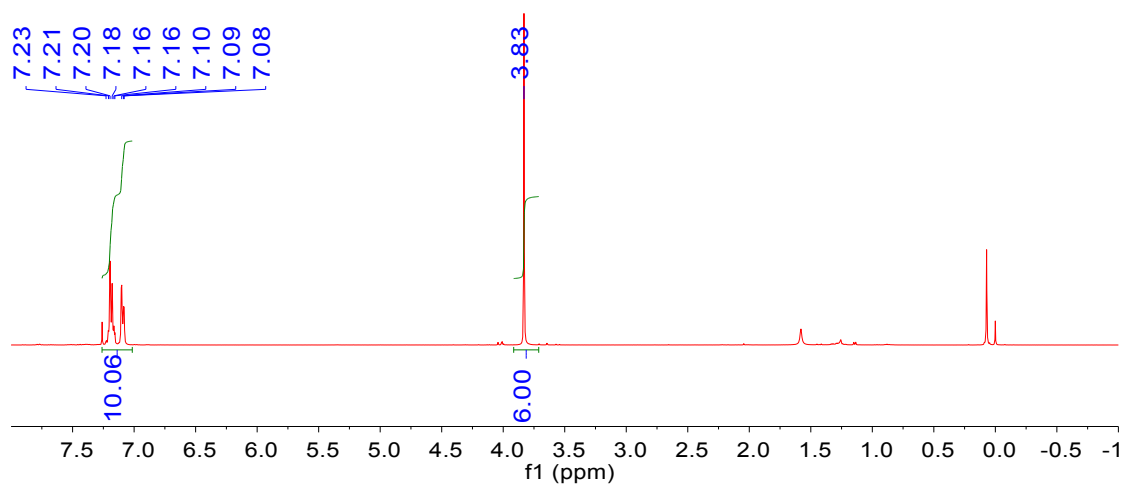

<sup>1</sup>H NMR spectrum of compound Z-4

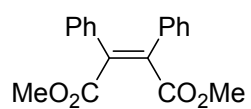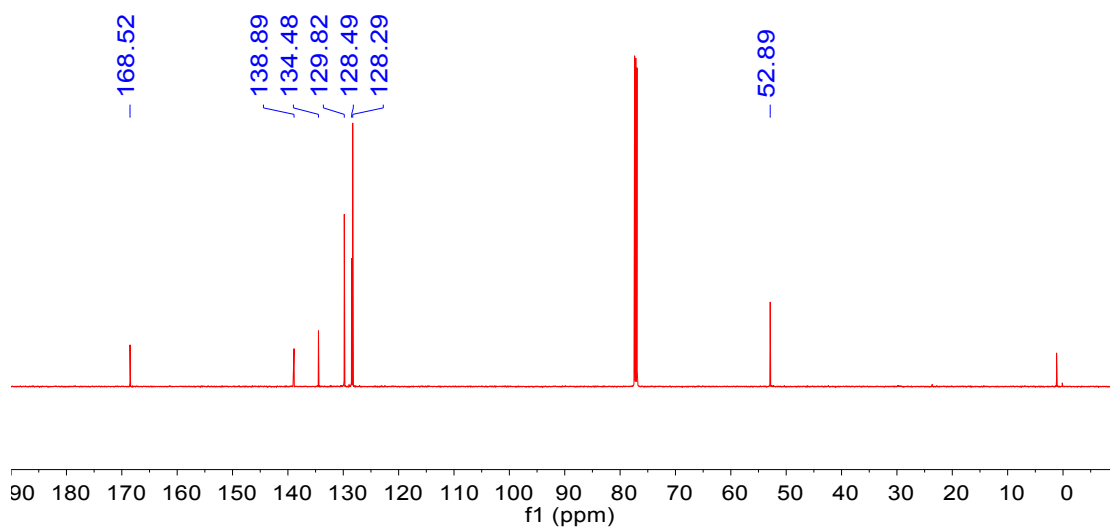

<sup>13</sup>C NMR spectrum of compound Z-4

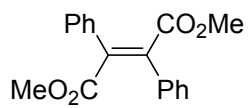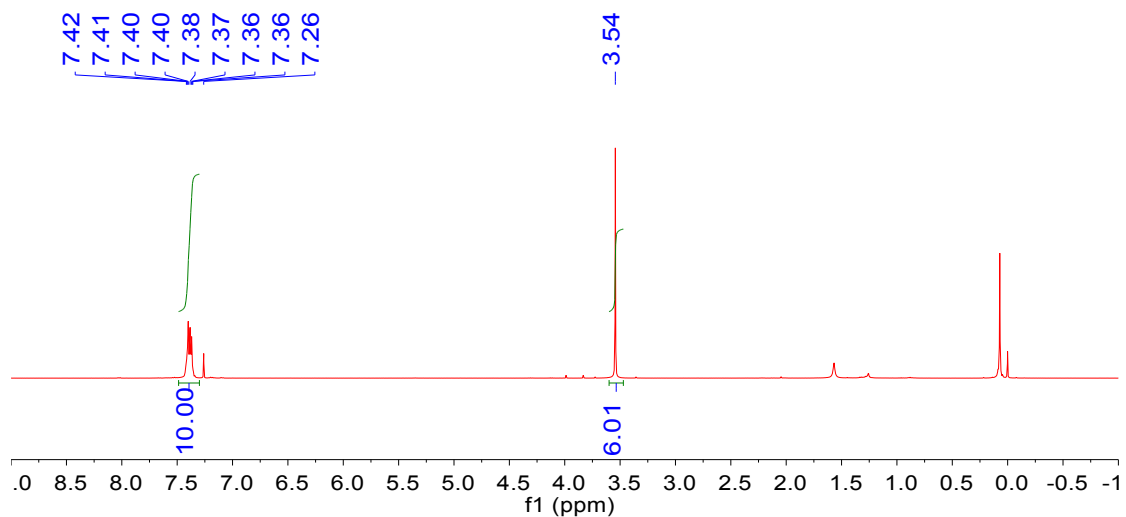

<sup>1</sup>H NMR spectrum of compound E-4

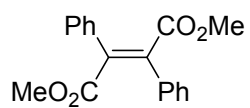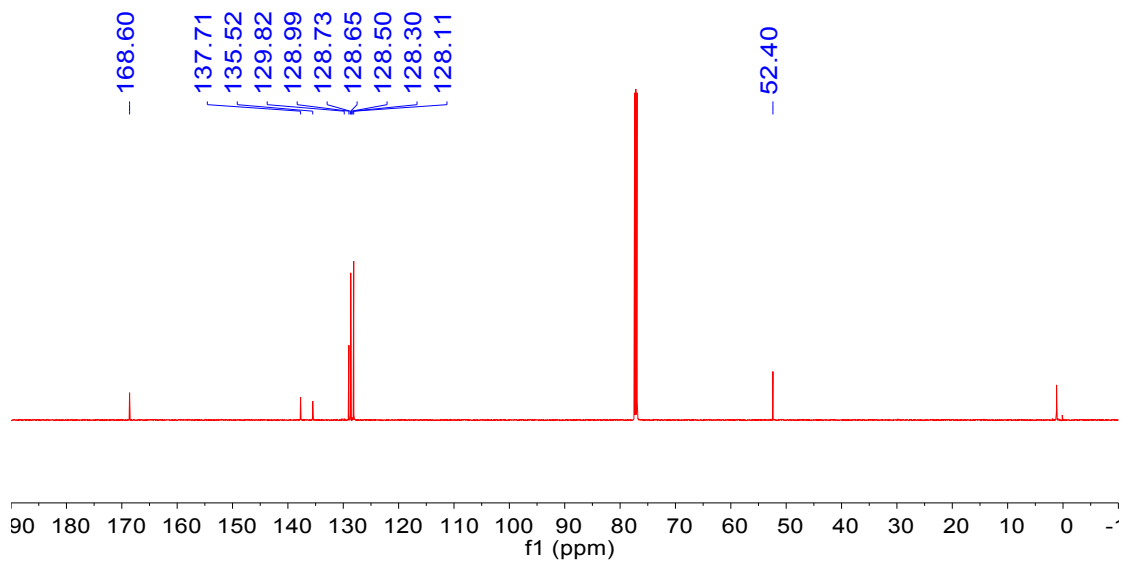

$^{13}\text{C}$  NMR spectrum of compound *E-4*
